# Supplementary material for: Untargeted Metabolomics Analysis Using FTIR and UHPLC-Q-Orbitrap HRMS of Two Curculigo Species and Evaluation of Their Antioxidant and α-Glucosidase Inhibitory Activities
Source: PubMed Central journal article supplement (PMC7827591; doi:10.3390/metabo11010042), 2021-01-08
Supplement: metabolites-11-00042-s001.pdf [file metabolites-11-00042-s001.pdf]

## Supplementary Material

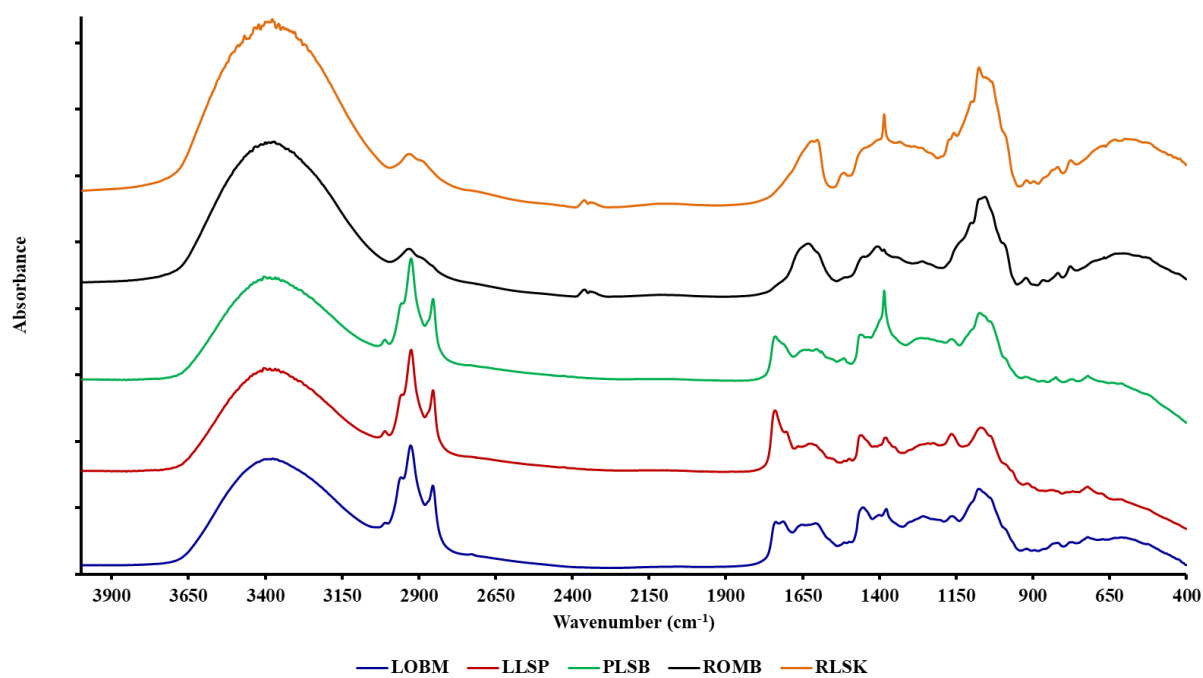

Figure S1. FTIR spectra of a 70% ethanol extract of *C. orchoides* and *C. latifolia* plant parts.

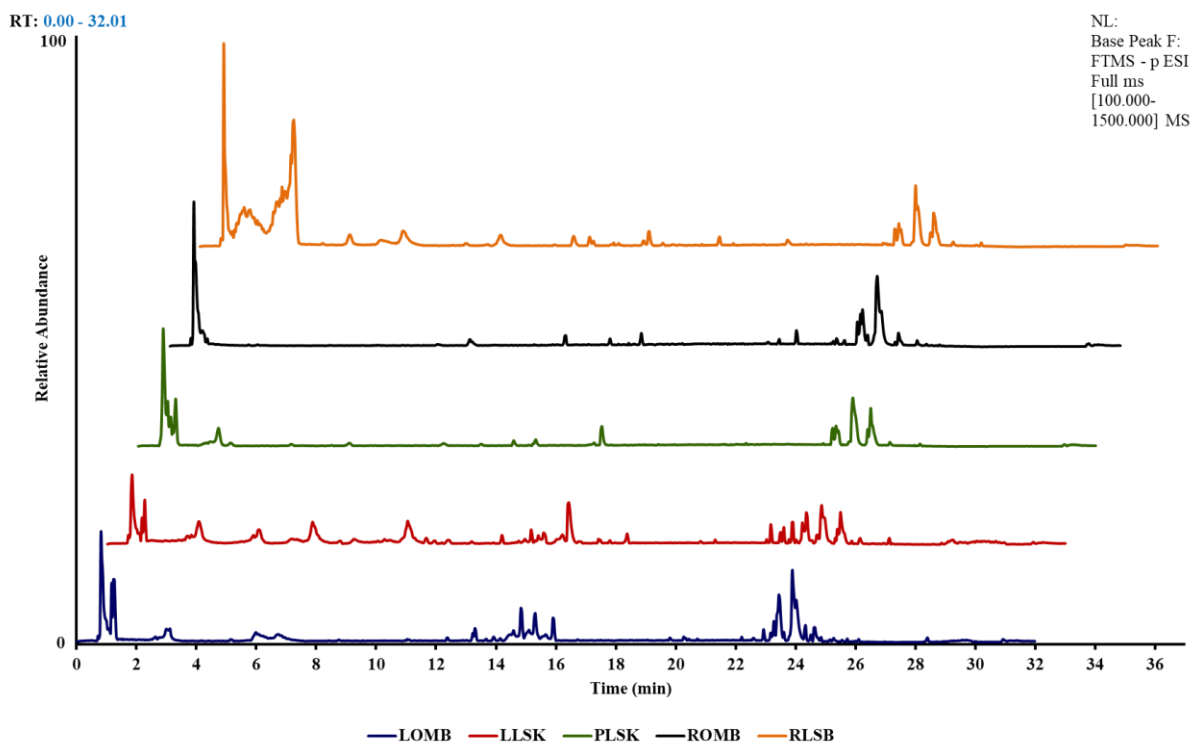

Figure S2. A typical total ion chromatograms profiles of 70% ethanol extracts of *C. orchoides* and *C. latifolia* plant parts.

**Table S1.** The chemical compounds identified in all sample extracts of *Curculigo orchioides* and *Curculigo latifolia*.

| RT<br>[min]                            | Metabolite name                                  | Molecul<br>Formula                                            | [M + H] <sup>+</sup><br>[M – H] <sup>–</sup> | Obs. Mass | Cal. Mass | Error mass<br>(ppm) | MS/MS<br>Fragments                          | Chemical Type        |
|----------------------------------------|--------------------------------------------------|---------------------------------------------------------------|----------------------------------------------|-----------|-----------|---------------------|---------------------------------------------|----------------------|
| <b>ROBM (Rhizome Orchioides Barru)</b> |                                                  |                                                               |                                              |           |           |                     |                                             |                      |
| 0.80                                   | Unknown-1*                                       | C <sub>10</sub> H <sub>13</sub> N <sub>4</sub> O <sub>9</sub> | [M + H] <sup>+</sup>                         | 333.068   | 333.068   | 0.00                | -                                           | -                    |
| 0.88                                   | Crassifoside I                                   | C <sub>23</sub> H <sub>24</sub> O <sub>11</sub>               | [M – H] <sup>–</sup>                         | 475.128   | 475.132   | -8.11               | 457.114; 445.114; 387.108                   | Phenolic             |
| 0.88                                   | Ethyl 3,4-dihydroxybenzoate                      | C <sub>9</sub> H <sub>10</sub> O <sub>4</sub>                 | [M – H] <sup>–</sup>                         | 181.059   | 181.058   | 5.49                | 153.019; 151.003; 137.024; 135.008          | Phenolic             |
| 0.88                                   | 1,1-Bis(3,4-dihydroxyphenyl)-1-(2-furan)-methane | C <sub>17</sub> H <sub>14</sub> O <sub>5</sub>                | [M – H] <sup>–</sup>                         | 297.082   | 297.084   | -7.81               | 281.045; 269.081                            | Phenolic             |
| 1.20                                   | Unknown-2                                        | C <sub>4</sub> H <sub>12</sub> N <sub>6</sub>                 | [M+2H] <sup>2+</sup>                         | 144.113   | 144.112   | 6.94                | 112.087; 70.066                             | -                    |
| 1.37                                   | Unknown-3                                        | C <sub>30</sub> H <sub>26</sub> O                             | [M + H] <sup>+</sup>                         | 402.198   | 402.198   | 0.00                | -                                           | -                    |
| 2.85                                   | Unknown-4                                        | CH <sub>2</sub> NO <sub>7</sub>                               | [M + H] <sup>+</sup>                         | 139.982   | 139.983   | -7.14               | -                                           | -                    |
| 3.12                                   | Unknown-5                                        | C <sub>12</sub> H <sub>22</sub> O <sub>16</sub>               | [M – H] <sup>–</sup>                         | 422.092   | 422.091   | 2.37                | -                                           | -                    |
| 10.15                                  | Orchioside B                                     | C <sub>23</sub> H <sub>26</sub> O <sub>10</sub>               | [M + H] <sup>+</sup>                         | 463.149   | 463.153   | -6.89               | 350.143; 213.143                            | Phenolic glycosides  |
| 12.31                                  | Curculigoside B                                  | C <sub>21</sub> H <sub>24</sub> O <sub>11</sub>               | [M + H] <sup>+</sup>                         | 453.136   | 453.132   | 8.26                | 290.271; 276.244                            | Phenolic glycosides  |
| 13.17                                  | Unknown-6                                        | C <sub>9</sub> H <sub>11</sub> O <sub>5</sub>                 | [M + H] <sup>+</sup>                         | 199.059   | 199.060   | -5.02               | 181.049; 128.951                            | -                    |
| 13.48                                  | Unknown-7                                        | C <sub>13</sub> H <sub>28</sub> O <sub>20</sub>               | [M + H] <sup>+</sup>                         | 504.122   | 504.117   | 0.01                | -                                           | -                    |
| 13.49                                  | Unknown-8                                        | C <sub>36</sub> H <sub>31</sub> O <sub>10</sub>               | [M – H] <sup>–</sup>                         | 623.195   | 623.192   | 0.01                | -                                           | -                    |
| 15.11                                  | (1S,2R)-O-Methylnyasicoside                      | C <sub>24</sub> H <sub>28</sub> O <sub>11</sub>               | [M + H] <sup>+</sup>                         | 493.167   | 493.163   | 7.60                | 475.159; 313.117                            | Norlignan glycosides |
| 17.83                                  | Curculigosaponin G                               | C <sub>42</sub> H <sub>70</sub> O <sub>13</sub>               | [M + H] <sup>+</sup>                         | 783.489   | 783.482   | 9.04                | 621.867; 459.726                            | Cycloartane          |
| 18.99                                  | Lycorine                                         | C <sub>16</sub> H <sub>17</sub> NO <sub>4</sub>               | [M – H] <sup>–</sup>                         | 286.118   | 286.116   | 7.86                | 270.076; 268.097; 258.076; 256.097          | Alkaloid             |
| 20.26                                  | Unknown-9                                        | C <sub>65</sub> H <sub>56</sub> O <sub>3</sub>                | [M + H] <sup>+</sup>                         | 884.428   | 884.423   | 5.65                | -                                           | -                    |
| 20.67                                  | Curculigosaponin C                               | C <sub>41</sub> H <sub>68</sub> O <sub>13</sub>               | [M + H] <sup>+</sup>                         | 769.470   | 769.466   | 5.50                | 606.413; 474.370                            | Cycloartane          |
| 24.66                                  | Orchioside B                                     | C <sub>23</sub> H <sub>26</sub> O <sub>10</sub>               | [M – H] <sup>–</sup>                         | 461.157   | 461.153   | 9.35                | 443.134; 433.150; 371.113                   | Phenolic glycosides  |
| 26.03                                  | Unknown-10                                       | C <sub>7</sub> H <sub>12</sub> NO <sub>12</sub>               | [M – H] <sup>–</sup>                         | 302.038   | 302.036   | 6.62                | -                                           | -                    |
| 30.90                                  | Unknown-11                                       | C <sub>12</sub> H <sub>4</sub> O <sub>5</sub>                 | [M + H] <sup>+</sup>                         | 228.007   | 228.005   | 8.77                | -                                           | -                    |
| <b>ROMB (Rhizome Orchioides Maros)</b> |                                                  |                                                               |                                              |           |           |                     |                                             |                      |
| 0.90                                   | Crassifoside I                                   | C <sub>23</sub> H <sub>24</sub> O <sub>11</sub>               | [M – H] <sup>–</sup>                         | 475.1285  | 475.132   | -7.06               | 457.114; 445.114; 387.108                   | Phenolic             |
| 1.51                                   | Unknown-12                                       | C <sub>6</sub> H <sub>15</sub> N <sub>2</sub> O <sub>18</sub> | [M + H] <sup>+</sup>                         | 403.032   | 403.032   | 0.00                | -                                           | -                    |
| 2.76                                   | Orcinol glycoside                                | C <sub>13</sub> H <sub>18</sub> O <sub>7</sub>                | [M + H] <sup>+</sup>                         | 287.1083  | 287.105   | 10.63               | 269.100; 256.121; 254.993; 251.093; 237.020 | Phenolic glycosides  |
| 3.06                                   | Lycorine                                         | C <sub>16</sub> H <sub>17</sub> NO <sub>4</sub>               | [M + H] <sup>+</sup>                         | 288.1157  | 288.116   | -0.18               | 270.113; 252.102; 240.102; 216.102          | Alkaloid             |
| 3.60                                   | Orchioside A                                     | C <sub>22</sub> H <sub>26</sub> O <sub>11</sub>               | [M – H] <sup>–</sup>                         | 465.1489  | 465.148   | 3.00                | 449.108; 447.129; 435.129                   | Phenolic glycosides  |
| 9.22                                   | Unknown-13                                       | C <sub>28</sub> H <sub>19</sub> O <sub>14</sub>               | [M + H] <sup>+</sup>                         | 579.079   | 579.077   | 3.45                | -                                           | -                    |
| 9.83                                   | Orchioside B                                     | C <sub>23</sub> H <sub>26</sub> O <sub>10</sub>               | [M + H] <sup>+</sup>                         | 463.149   | 463.153   | -8.40               | 350.143; 213.143                            | Phenolic glycosides  |
| 12.89                                  | Unknown-14                                       | C <sub>45</sub> H <sub>11</sub> O <sub>2</sub>                | [M + H] <sup>+</sup>                         | 583.077   | 583.076   | 1.72                | -                                           | -                    |
| 15.08                                  | (1S,2R)-O-Methylnyasicoside                      | C <sub>24</sub> H <sub>28</sub> O <sub>11</sub>               | [M + H] <sup>+</sup>                         | 493.167   | 493.163   | 8.00                | 475.159; 313.117                            | Norlignan glycosides |
| 15.88                                  | Unknown-15                                       | C <sub>2</sub> H <sub>10</sub> N <sub>5</sub> O <sub>5</sub>  | [M + H] <sup>+</sup>                         | 184.068   | 184.068   | 0.00                | -                                           | -                    |
| 16.49                                  | Curculigosaponin C                               | C <sub>41</sub> H <sub>68</sub> O <sub>13</sub>               | [M + H] <sup>+</sup>                         | 769.474   | 769.466   | 10.70               | 606.413; 474.370                            | Cycloartane          |
| 20.32                                  | Curculigosaponin G                               | C <sub>42</sub> H <sub>70</sub> O <sub>13</sub>               | [M + H] <sup>+</sup>                         | 783.480   | 783.482   | -2.32               | 621.867; 459.726                            | Cycloartane          |

Table S1. Cont.

|                                          |                                                  |                                                                |                      |         |         |       |                                             |                      |  |
|------------------------------------------|--------------------------------------------------|----------------------------------------------------------------|----------------------|---------|---------|-------|---------------------------------------------|----------------------|--|
| 20.32                                    | Curculigosaponin H                               | C <sub>47</sub> H <sub>78</sub> O <sub>17</sub>                | [M + H] <sup>+</sup> | 915.529 | 915.524 | 5.93  | 751.350; 589.137; 458.650                   | Cycloartane          |  |
| 21.02                                    | Unknown-16                                       | C <sub>17</sub> H <sub>15</sub> O <sub>3</sub>                 | [M + H] <sup>+</sup> | 267.102 | 267.102 | 0.00  | -                                           | -                    |  |
| 21.86                                    | Curculigoside B                                  | C <sub>21</sub> H <sub>24</sub> O <sub>11</sub>                | [M + H] <sup>+</sup> | 453.134 | 453.132 | 4.07  | 290.271; 276.244                            | Phenolic glycosides  |  |
| 24.58                                    | Orchioside B                                     | C <sub>23</sub> H <sub>26</sub> O <sub>10</sub>                | [M - H] <sup>-</sup> | 461.157 | 461.153 | 10.21 | 443.134; 433.150; 371.113                   | Phenolic glycosides  |  |
| 25.48                                    | Curculigosaponin C                               | C <sub>41</sub> H <sub>68</sub> O <sub>13</sub>                | [M - H] <sup>-</sup> | 767.465 | 767.466 | -1.91 | 693.421; 659.416                            | Cycloartane          |  |
| 26.79                                    | Unknown-17                                       | C <sub>43</sub> H <sub>82</sub> O <sub>17</sub>                | [M + H] <sup>+</sup> | 870.561 | 870.555 | 6.89  | -                                           | -                    |  |
| 31.11                                    | 2,4-Dichloro-5-methoxy-3-methylphenol            | C <sub>8</sub> H <sub>8</sub> Cl <sub>2</sub> O <sub>2</sub>   | [M - H] <sup>-</sup> | 204.992 | 204.990 | 9.60  | 176.987; 174.972; 154.990; 150.972          | Phenolic             |  |
| <b>ROGM (Rhizome Orchioides Gowa)</b>    |                                                  |                                                                |                      |         |         |       |                                             |                      |  |
| 0.79                                     | Unknown-18                                       | C <sub>11</sub> H <sub>20</sub> N <sub>11</sub> O <sub>5</sub> | [M + H] <sup>+</sup> | 386.165 | 386.164 | 2.59  | -                                           | -                    |  |
| 0.90                                     | 1,1-Bis(3,4-dihydroxyphenyl)-1-(2-furan)-methane | C <sub>17</sub> H <sub>14</sub> O <sub>5</sub>                 | [M - H] <sup>-</sup> | 297.082 | 297.084 | -8.82 | 281.045; 269.081                            | Phenolic             |  |
| 3.12                                     | Orcinol glycoside                                | C <sub>13</sub> H <sub>18</sub> O <sub>7</sub>                 | [M + H] <sup>+</sup> | 287.107 | 287.105 | 7.15  | 269.100; 256.121; 254.993; 251.093; 237.020 | Phenolic glycosides  |  |
| 3.12                                     | Lycorine                                         | C <sub>16</sub> H <sub>17</sub> NO <sub>4</sub>                | [M + H] <sup>+</sup> | 288.116 | 288.116 | 0.86  | 270.113; 252.102; 240.102; 216.102          | Alkaloid             |  |
| 3.19                                     | Curculigoside B                                  | C <sub>21</sub> H <sub>24</sub> O <sub>11</sub>                | [M + H] <sup>+</sup> | 453.134 | 453.132 | 5.39  | 290.271; 276.244                            | Phenolic glycosides  |  |
| 3.65                                     | Orchioside A                                     | C <sub>22</sub> H <sub>26</sub> O <sub>11</sub>                | [M - H] <sup>-</sup> | 465.150 | 465.148 | 4.29  | 449.108; 447.129; 435.129                   | Phenolic glycosides  |  |
| 3.65                                     | Curculigoside C                                  | C <sub>22</sub> H <sub>26</sub> O <sub>12</sub>                | [M - H] <sup>-</sup> | 481.139 | 481.142 | -8.15 | 463.124; 453.140; 451.124                   | Phenolic glycosides  |  |
| 11.14                                    | Unknown-19                                       | C <sub>29</sub> H <sub>25</sub> O <sub>4</sub>                 | [M + H] <sup>+</sup> | 441.207 | 441.206 | 2.27  | -                                           | -                    |  |
| 15.13                                    | (1S,2R)-O-Methylnyasicoside                      | C <sub>24</sub> H <sub>28</sub> O <sub>11</sub>                | [M + H] <sup>+</sup> | 493.168 | 493.163 | 10.23 | 475.159; 313.117                            | Norlignan glycosides |  |
| 15.80                                    | Curculigosaponin G                               | C <sub>42</sub> H <sub>70</sub> O <sub>13</sub>                | [M + H] <sup>+</sup> | 783.486 | 783.482 | 5.47  | 621.867; 459.726                            | Cycloartane          |  |
| 15.96                                    | Unknown-20                                       | C <sub>37</sub> H <sub>16</sub> O <sub>2</sub>                 | [M + H] <sup>+</sup> | 492.116 | 492.115 | 2.03  | -                                           | -                    |  |
| 18.20                                    | Curculigosaponin I                               | C <sub>48</sub> H <sub>80</sub> O <sub>18</sub>                | [M + H] <sup>+</sup> | 945.540 | 945.534 | 5.46  | 783.009; 621.867; 458.726                   | Cycloartane          |  |
| 18.21                                    | Curculigosaponin I                               | C <sub>48</sub> H <sub>80</sub> O <sub>18</sub>                | [M - H] <sup>-</sup> | 943.527 | 943.534 | -8.20 | 783.009; 621.867; 458.726                   | Cycloartane          |  |
| 22.39                                    | Unknown-21                                       | C <sub>47</sub> H <sub>47</sub> O <sub>2</sub>                 | [M + H] <sup>+</sup> | 643.358 | 643.358 | 0.00  | -                                           | -                    |  |
| 23.90                                    | Unknown-22                                       | C <sub>44</sub> H <sub>56</sub> O <sub>3</sub>                 | [M + H] <sup>+</sup> | 632.426 | 632.423 | 4.74  | -                                           | -                    |  |
| 24.03                                    | Unknown-23                                       | C <sub>17</sub> H <sub>46</sub> N <sub>13</sub> O <sub>4</sub> | [M + H] <sup>+</sup> | 496.379 | 496.380 | -2.01 | -                                           | -                    |  |
| 24.27                                    | Unknown-24                                       | C <sub>16</sub> H <sub>33</sub> O <sub>10</sub>                | [M + H] <sup>+</sup> | 385.210 | 385.207 | 7.79  | -                                           | -                    |  |
| 31.19                                    | 2,4-Dichloro-5-methoxy-3-methylphenol            | C <sub>8</sub> H <sub>8</sub> Cl <sub>2</sub> O <sub>2</sub>   | [M - H] <sup>-</sup> | 204.992 | 204.990 | 10.57 | 176.987; 174.972; 154.990; 150.972          | Phenolic             |  |
| <b>RLSP (Rhizome Latifolia Palangka)</b> |                                                  |                                                                |                      |         |         |       |                                             |                      |  |
| 0.73                                     | Unknown-25***                                    | H <sub>7</sub> N <sub>5</sub> O <sub>4</sub>                   | [M + H] <sup>+</sup> | 141.050 | 141.049 | 7.09  | -                                           | -                    |  |
| 0.83                                     | Unknown-26**                                     | C <sub>16</sub> H <sub>11</sub> O <sub>2</sub>                 | [M + H] <sup>+</sup> | 235.078 | 235.076 | 8.51  | -                                           | -                    |  |
| 1.32                                     | Curculigoside B                                  | C <sub>21</sub> H <sub>24</sub> O <sub>11</sub>                | [M + H] <sup>+</sup> | 453.136 | 453.132 | 8.48  | 290.271; 276.244                            | Phenolic glycosides  |  |
| 1.40                                     | Crassifoside I                                   | C <sub>23</sub> H <sub>24</sub> O <sub>11</sub>                | [M - H] <sup>-</sup> | 475.127 | 475.132 | -9.59 | 457.114; 445.114; 387.108                   | Phenolic             |  |
| 1.47                                     | 2,4-Dichloro-5-methoxy-3-methylphenol            | C <sub>8</sub> H <sub>8</sub> Cl <sub>2</sub> O <sub>2</sub>   | [M - H] <sup>-</sup> | 204.990 | 204.990 | -2.60 | 176.987; 174.972; 154.990; 150.972          | Phenolic             |  |
| 3.13                                     | Lycorine                                         | C <sub>16</sub> H <sub>17</sub> NO <sub>4</sub>                | [M + H] <sup>+</sup> | 288.116 | 288.116 | -0.88 | 270.113; 252.102; 240.102; 216.102          | Alkaloid             |  |
| 3.14                                     | Unknown-27                                       | C <sub>11</sub> H <sub>16</sub> N <sub>9</sub> O <sub>2</sub>  | [M + H] <sup>+</sup> | 306.143 | 306.142 | 3.27  | -                                           | -                    |  |
| 3.15                                     | Unknown-28                                       | C <sub>23</sub> H <sub>39</sub> O                              | [M - H] <sup>-</sup> | 331.301 | 331.300 | 3.02  | -                                           | -                    |  |
| 3.71                                     | Orchioside A                                     | C <sub>22</sub> H <sub>26</sub> O <sub>11</sub>                | [M - H] <sup>-</sup> | 465.150 | 465.148 | 6.01  | 449.108; 447.129; 435.129                   | Phenolic glycosides  |  |
| 4.13                                     | Unknown-29                                       | C <sub>14</sub> H <sub>14</sub> N <sub>11</sub> O <sub>2</sub> | [M - H] <sup>-</sup> | 368.133 | 368.133 | 0.00  | -                                           | -                    |  |

Table S1. Cont.

|                                             |                                                  |                                                               |                      |         |         |       |                                    |                      |  |
|---------------------------------------------|--------------------------------------------------|---------------------------------------------------------------|----------------------|---------|---------|-------|------------------------------------|----------------------|--|
| 5.01                                        | Unknown-30                                       | C <sub>23</sub> H <sub>10</sub> O <sub>12</sub>               | [M – H] <sup>–</sup> | 478.019 | 478.017 | 4.18  | -                                  | -                    |  |
| 9.44                                        | Unknown-31                                       | C <sub>12</sub> H <sub>20</sub> O <sub>19</sub>               | [M + H] <sup>+</sup> | 468.058 | 468.059 | -2.14 | -                                  | -                    |  |
| 10.13                                       | Orchioside B                                     | C <sub>23</sub> H <sub>26</sub> O <sub>10</sub>               | [M + H] <sup>+</sup> | 463.150 | 463.153 | -6.24 | 350.143; 213.143                   | Phenolic glycosides  |  |
| 10.88                                       | Unknown-32                                       | C <sub>21</sub> H <sub>27</sub> O <sub>10</sub>               | [M + H] <sup>+</sup> | 439.158 | 439.160 | -4.55 | -                                  | -                    |  |
| 10.90                                       | Curculigoside B                                  | C <sub>21</sub> H <sub>24</sub> O <sub>11</sub>               | [M – H] <sup>–</sup> | 451.136 | 451.132 | 8.08  | 433.114; 423.129                   | Phenolic glycosides  |  |
| 11.82                                       | Unknown-33                                       | C <sub>27</sub> H <sub>27</sub> O <sub>16</sub>               | [M – H] <sup>–</sup> | 607.132 | 607.130 | 3.29  | -                                  | -                    |  |
| 12.72                                       | Unknown-34                                       | C <sub>69</sub> H <sub>41</sub> O <sub>5</sub>                | [M + H] <sup>+</sup> | 949.296 | 949.295 | 1.05  | -                                  | -                    |  |
| 15.47                                       | (1S,2R)-O-Methylnyasicoside                      | C <sub>24</sub> H <sub>28</sub> O <sub>11</sub>               | [M + H] <sup>+</sup> | 493.167 | 493.163 | 8.00  | 475.159; 313.117                   | Norlignan glycosides |  |
| 17.82                                       | Unknown-35                                       | C <sub>24</sub> H <sub>26</sub> O <sub>19</sub>               | [M – H] <sup>–</sup> | 618.106 | 618.107 | -1.62 | -                                  | -                    |  |
| 18.16                                       | Unknown-36                                       | C <sub>25</sub> H <sub>29</sub> O                             | [M + H] <sup>+</sup> | 345.224 | 345.221 | 8.69  | -                                  | -                    |  |
| 19.02                                       | Lycorine                                         | C <sub>16</sub> H <sub>17</sub> NO <sub>4</sub>               | [M – H] <sup>–</sup> | 286.118 | 286.116 | 8.90  | 270.076; 268.097; 258.076; 256.097 | Alkaloid             |  |
| 20.25                                       | Falcarinol                                       | C <sub>17</sub> H <sub>24</sub> O                             | [M – H] <sup>–</sup> | 244.182 | 244.183 | -4.10 | 227.144; 215.144; 201.128; 187.149 | Organic hydroxy      |  |
| 24.50                                       | Orchioside B                                     | C <sub>23</sub> H <sub>26</sub> O <sub>10</sub>               | [M – H] <sup>–</sup> | 461.157 | 461.153 | 9.13  | 443.134; 433.150; 371.113          | Phenolic glycosides  |  |
| 24.87                                       | Curculigosaponin G                               | C <sub>42</sub> H <sub>70</sub> O <sub>13</sub>               | [M + H] <sup>+</sup> | 783.483 | 783.482 | 2.15  | 621.867; 459.726                   | Cycloartane          |  |
| 26.09                                       | Unknown-37                                       | C <sub>26</sub> H <sub>45</sub> O <sub>5</sub>                | [M – H] <sup>–</sup> | 437.325 | 437.327 | -4.57 | -                                  | -                    |  |
| 26.84                                       | Unknown-38                                       | C <sub>51</sub> H <sub>84</sub> O <sub>14</sub>               | [M + H] <sup>+</sup> | 920.585 | 920.586 | -1.09 | -                                  | -                    |  |
| 29.03                                       | 3-O-B-D-Glucopyranosyl sitosterol                | C <sub>35</sub> H <sub>60</sub> O <sub>6</sub>                | [M – H] <sup>–</sup> | 575.434 | 575.439 | -7.93 | 559.400; 547.400; 477.322          | Sitosterol           |  |
| 31.17                                       | 2,4-Dichloro-5-methoxy-3-methylphenol            | C <sub>8</sub> H <sub>8</sub> Cl <sub>2</sub> O <sub>2</sub>  | [M – H] <sup>–</sup> | 204.992 | 204.990 | 10.57 | 176.987; 174.972; 154.990; 150.972 | Phenolic             |  |
| <b>RLSB (Rhizome Latifolia Biji Nangka)</b> |                                                  |                                                               |                      |         |         |       |                                    |                      |  |
| 0.80                                        | Unknown-39*                                      | C <sub>10</sub> H <sub>13</sub> N <sub>4</sub> O <sub>9</sub> | [M + H] <sup>+</sup> | 333.068 | 333.068 | 0.00  | -                                  | -                    |  |
| 0.88                                        | Crassifoside I                                   | C <sub>23</sub> H <sub>24</sub> O <sub>11</sub>               | [M – H] <sup>–</sup> | 475.129 | 475.132 | -5.80 | 457.114; 445.114; 387.108          | Phenolic             |  |
| 0.91                                        | 1,1-Bis(3,4-dihydroxyphenyl)-1-(2-furan)-methane | C <sub>17</sub> H <sub>14</sub> O <sub>5</sub>                | [M – H] <sup>–</sup> | 297.081 | 297.084 | -9.83 | 281.045; 269.081                   | Phenolic             |  |
| 0.96                                        | Lycorine                                         | C <sub>16</sub> H <sub>17</sub> NO <sub>4</sub>               | [M + H] <sup>+</sup> | 288.116 | 288.116 | 0.86  | 270.113; 252.102; 240.102; 216.102 | Alkaloid             |  |
| 1.44                                        | 2,4-Dichloro-5-methoxy-3-methylphenol            | C <sub>8</sub> H <sub>8</sub> Cl <sub>2</sub> O <sub>2</sub>  | [M – H] <sup>–</sup> | 204.990 | 204.990 | -1.14 | 176.987; 174.972; 154.990; 150.972 | Phenolic             |  |
| 2.59                                        | Curculigoside B                                  | C <sub>21</sub> H <sub>24</sub> O <sub>11</sub>               | [M – H] <sup>–</sup> | 451.135 | 451.132 | 6.75  | 433.114; 423.129                   | Phenolic glycosides  |  |
| 2.98                                        | Unknown-40                                       | C <sub>32</sub> H <sub>31</sub> O <sub>19</sub>               | [M – H] <sup>–</sup> | 719.146 | 719.146 | 0.00  | -                                  | -                    |  |
| 3.20                                        | Lycorine                                         | C <sub>16</sub> H <sub>17</sub> NO <sub>4</sub>               | [M + H] <sup>+</sup> | 288.115 | 288.116 | -2.61 | 270.113; 252.102; 240.102; 216.102 | Alkaloid             |  |
| 3.78                                        | Orchioside A                                     | C <sub>22</sub> H <sub>26</sub> O <sub>11</sub>               | [M – H] <sup>–</sup> | 465.149 | 465.148 | 3.00  | 449.108; 447.129; 435.129          | Phenolic glycosides  |  |
| 5.12                                        | Unknown-41                                       | C <sub>52</sub> H <sub>51</sub> O <sub>20</sub>               | [M – H] <sup>–</sup> | 995.294 | 995.297 | -3.01 | -                                  | -                    |  |
| 5.96                                        | Unknown-42                                       | C <sub>37</sub> H <sub>33</sub> O <sub>11</sub>               | [M + H] <sup>+</sup> | 653.206 | 653.202 | 6.12  | -                                  | -                    |  |
| 6.47                                        | Curculigoside B                                  | C <sub>21</sub> H <sub>24</sub> O <sub>11</sub>               | [M + H] <sup>+</sup> | 453.132 | 453.132 | 0.10  | 290.271; 276.244                   | Phenolic glycosides  |  |
| 6.94                                        | Unknown-43                                       | C <sub>43</sub> H <sub>22</sub> O <sub>14</sub>               | [M + H] <sup>+</sup> | 762.105 | 762.100 | 6.56  | -                                  | -                    |  |
| 8.04                                        | Longirostrerone A                                | C <sub>32</sub> H <sub>40</sub> O <sub>7</sub>                | [M + H] <sup>+</sup> | 536.273 | 536.277 | -7.46 | 519.274; 501.263; 475.284; 447.180 | -                    |  |
| 10.36                                       | Unknown-44                                       | C <sub>62</sub> H <sub>52</sub> O <sub>11</sub>               | [M + H] <sup>+</sup> | 972.345 | 972.350 | -5.14 | -                                  | -                    |  |
| 12.55                                       | Unknown-45                                       | C <sub>66</sub> H <sub>40</sub> O <sub>10</sub>               | [M – H] <sup>–</sup> | 992.265 | 992.262 | 3.02  | -                                  | -                    |  |
| 12.71                                       | Unknown-46                                       | C <sub>24</sub> H <sub>41</sub> O <sub>14</sub>               | [M + H] <sup>+</sup> | 553.247 | 553.249 | -3.62 | -                                  | -                    |  |
| 14.20                                       | Unknown-47                                       | C <sub>29</sub> H <sub>37</sub> O <sub>16</sub>               | [M + H] <sup>+</sup> | 641.207 | 641.208 | -1.56 | -                                  | -                    |  |

Table S1. Cont.

|                                        |                                                  |                                                               |                      |         |         |       |                                             |                     |  |
|----------------------------------------|--------------------------------------------------|---------------------------------------------------------------|----------------------|---------|---------|-------|---------------------------------------------|---------------------|--|
| 15.60                                  | Sarmentosumin D                                  | C <sub>50</sub> H <sub>42</sub> O <sub>9</sub>                | [M + H] <sup>+</sup> | 786.279 | 786.283 | -5.09 | 769.279; 759.295; 691.232                   | -                   |  |
| 16.51                                  | Tenuifoliside B                                  | C <sub>30</sub> H <sub>36</sub> O <sub>17</sub>               | [M - H] <sup>-</sup> | 668.197 | 668.195 | 2.99  | 385.114; 369.082; 367.103; 355.103          | -                   |  |
| 16.88                                  | Unknown-48                                       | C <sub>20</sub> H <sub>23</sub> O <sub>5</sub>                | [M + H] <sup>+</sup> | 343.154 | 343.155 | -2.91 | -                                           | -                   |  |
| 17.42                                  | Unknown-49                                       | C <sub>29</sub> H <sub>37</sub> O <sub>12</sub>               | [M - H] <sup>-</sup> | 577.229 | 577.228 | 1.73  | -                                           | -                   |  |
| 18.04                                  | Unknown-50                                       | C <sub>40</sub> H <sub>37</sub> O <sub>17</sub>               | [M + H] <sup>+</sup> | 789.199 | 789.203 | -5.07 | -                                           | -                   |  |
| 19.03                                  | Lycorine                                         | C <sub>16</sub> H <sub>17</sub> NO <sub>4</sub>               | [M - H] <sup>-</sup> | 286.118 | 286.116 | 6.11  | 270.076; 268.097; 258.076; 256.097          | Alkaloid            |  |
| 19.64                                  | Unknown-51                                       | C <sub>58</sub> H <sub>37</sub> O <sub>13</sub>               | [M - H] <sup>-</sup> | 941.225 | 941.223 | 2.12  | -                                           | -                   |  |
| 19.66                                  | Unknown-52                                       | C <sub>33</sub> H <sub>17</sub> O <sub>2</sub>                | [M + H] <sup>+</sup> | 445.123 | 445.122 | 2.25  | -                                           | -                   |  |
| 19.72                                  | Curculigoside C                                  | C <sub>22</sub> H <sub>26</sub> O <sub>12</sub>               | [M + H] <sup>+</sup> | 483.144 | 483.142 | 3.69  | 465.139; 421.112                            | Phenolic glycosides |  |
| 21.00                                  | Unknown-53                                       | C <sub>28</sub> H <sub>47</sub> O <sub>6</sub>                | [M + H] <sup>+</sup> | 479.341 | 479.337 | 8.34  | -                                           | -                   |  |
| 23.25                                  | Curculigosaponin G                               | C <sub>42</sub> H <sub>70</sub> O <sub>13</sub>               | [M - H] <sup>-</sup> | 781.476 | 781.482 | -7.06 | 621.867; 459.726                            | Cycloartane         |  |
| 23.51                                  | Ecdysterone                                      | C <sub>27</sub> H <sub>44</sub> O <sub>7</sub>                | [M + H] <sup>+</sup> | 480.308 | 480.309 | -2.08 | 473.333; 467.106; 454.833; 451.750          | -                   |  |
| 24.62                                  | Curculigoside B                                  | C <sub>21</sub> H <sub>24</sub> O <sub>11</sub>               | [M - H] <sup>-</sup> | 451.128 | 451.132 | -9.21 | 433.114; 423.129                            | Phenolic glycosides |  |
| 24.62                                  | Orchioside B                                     | C <sub>23</sub> H <sub>26</sub> O <sub>10</sub>               | [M - H] <sup>-</sup> | 461.157 | 461.153 | 10.00 | 443.134; 433.150; 371.113                   | Phenolic glycosides |  |
| 26.11                                  | Unknown-54                                       | C <sub>11</sub> H <sub>5</sub> O <sub>18</sub>                | [M - H] <sup>-</sup> | 424.949 | 424.948 | 2.35  | -                                           | -                   |  |
| 28.64                                  | Unknown-55                                       | C <sub>52</sub> H <sub>102</sub> O <sub>11</sub>              | [M + H] <sup>+</sup> | 902.733 | 902.742 | -9.97 | -                                           | -                   |  |
| 29.29                                  | Unknown-56                                       | C <sub>41</sub> H <sub>73</sub> O <sub>6</sub>                | [M + H] <sup>+</sup> | 661.537 | 661.540 | -4.53 | -                                           | -                   |  |
| <b>RLSK (Rhizome Latifolia Puncak)</b> |                                                  |                                                               |                      |         |         |       |                                             |                     |  |
| 0.73                                   | Unknown-57***                                    | H <sub>7</sub> N <sub>5</sub> O <sub>4</sub>                  | [M + H] <sup>+</sup> | 141.050 | 141.049 | 7.09  | -                                           | -                   |  |
| 0.80                                   | Unknown-58*                                      | C <sub>10</sub> H <sub>13</sub> N <sub>4</sub> O <sub>9</sub> | [M + H] <sup>+</sup> | 333.068 | 333.068 | 0.00  | -                                           | -                   |  |
| 0.91                                   | 1,1-Bis(3,4-dihydroxyphenyl)-1-(2-furan)-methane | C <sub>17</sub> H <sub>14</sub> O <sub>5</sub>                | [M - H] <sup>-</sup> | 297.082 | 297.084 | -8.14 | 281.045; 269.081                            | Phenolic            |  |
| 0.93                                   | Lycorine                                         | C <sub>16</sub> H <sub>17</sub> NO <sub>4</sub>               | [M + H] <sup>+</sup> | 288.116 | 288.116 | 1.21  | 270.113; 252.102; 240.102; 216.102          | Alkaloid            |  |
| 1.45                                   | 2,4-Dichloro-5-methoxy-3-methylphenol            | C <sub>8</sub> H <sub>8</sub> Cl <sub>2</sub> O <sub>2</sub>  | [M - H] <sup>-</sup> | 204.989 | 204.990 | -3.57 | 176.987; 174.972; 154.990; 150.972          | Phenolic            |  |
| 2.70                                   | Unknown-59                                       | C <sub>24</sub> H <sub>27</sub> O <sub>14</sub>               | [M - H] <sup>-</sup> | 539.140 | 539.140 | 0.00  | -                                           | -                   |  |
| 2.78                                   | Lycorine                                         | C <sub>16</sub> H <sub>17</sub> NO <sub>4</sub>               | [M + H] <sup>+</sup> | 288.115 | 288.116 | -2.61 | 270.113; 252.102; 240.102; 216.102          | Alkaloid            |  |
| 2.90                                   | Unknown-60                                       | C <sub>48</sub> H <sub>28</sub> O                             | [M - H] <sup>-</sup> | 620.214 | 620.214 | 0.00  | -                                           | -                   |  |
| 3.12                                   | Orcinol glycoside                                | C <sub>13</sub> H <sub>18</sub> O <sub>7</sub>                | [M + H] <sup>+</sup> | 287.107 | 287.105 | 7.50  | 269.100; 256.121; 254.993; 251.093; 237.020 | Phenolic glycosides |  |
| 3.15                                   | Unknown-61                                       | C <sub>65</sub> H <sub>107</sub> O <sub>2</sub>               | [M + H] <sup>+</sup> | 919.827 | 919.827 | 0.00  | -                                           | -                   |  |
| 3.17                                   | Unknown-62                                       | C <sub>64</sub> H <sub>101</sub> O <sub>3</sub>               | [M - H] <sup>-</sup> | 917.777 | 917.775 | 2.18  | -                                           | -                   |  |
| 6.38                                   | Curculigoside B                                  | C <sub>21</sub> H <sub>24</sub> O <sub>11</sub>               | [M + H] <sup>+</sup> | 453.132 | 453.132 | -0.12 | 290.271; 276.244                            | Phenolic glycosides |  |
| 7.77                                   | Unknown-63                                       | C <sub>17</sub> H <sub>36</sub> O <sub>14</sub>               | [M + H] <sup>+</sup> | 464.213 | 464.210 | 6.46  | -                                           | -                   |  |
| 12.54                                  | Unknown-64                                       | C <sub>36</sub> H <sub>19</sub> O <sub>14</sub>               | [M - H] <sup>-</sup> | 675.082 | 675.077 | 7.41  | -                                           | -                   |  |
| 14.14                                  | Orchioside A                                     | C <sub>22</sub> H <sub>26</sub> O <sub>11</sub>               | [M + H] <sup>+</sup> | 467.153 | 467.148 | 10.91 | 305.144; 291.144                            | Phenolic glycosides |  |
| 14.48                                  | Unknown-65                                       | C <sub>22</sub> H <sub>27</sub> O <sub>10</sub>               | [M + H] <sup>+</sup> | 451.158 | 451.160 | -4.43 | -                                           | -                   |  |
| 15.52                                  | Unknown-66                                       | C <sub>47</sub> H <sub>21</sub> O <sub>19</sub>               | [M - H] <sup>-</sup> | 889.065 | 889.068 | -3.37 | -                                           | -                   |  |
| 23.38                                  | Unknown-67                                       | C <sub>36</sub> H <sub>43</sub> O <sub>9</sub>                | [M - H] <sup>-</sup> | 619.289 | 619.292 | -4.84 | -                                           | -                   |  |
| 24.68                                  | Curculigoside B                                  | C <sub>21</sub> H <sub>24</sub> O <sub>11</sub>               | [M - H] <sup>-</sup> | 451.128 | 451.132 | -9.21 | 433.114; 423.129                            | Phenolic glycosides |  |

Table S1. Cont.

|                                     |                                                  |                                                                |                      |         |         |       |                                             |                     |
|-------------------------------------|--------------------------------------------------|----------------------------------------------------------------|----------------------|---------|---------|-------|---------------------------------------------|---------------------|
| 24.68                               | Orchioside B                                     | C <sub>23</sub> H <sub>26</sub> O <sub>10</sub>                | [M – H] <sup>–</sup> | 461.157 | 461.153 | 10.00 | 443.134; 433.150; 371.113                   | Phenolic glycosides |
| 24.77                               | Unknown-68                                       | C <sub>61</sub> H <sub>82</sub> O <sub>5</sub>                 | [M + H] <sup>+</sup> | 894.618 | 894.616 | 2.24  | -                                           | -                   |
| 25.21                               | Unknown-69                                       | C <sub>34</sub> H <sub>62</sub> N <sub>15</sub> O <sub>9</sub> | [M – H] <sup>–</sup> | 824.485 | 824.485 | 0.00  | -                                           | -                   |
| 26.12                               | Unknown-70                                       | C <sub>48</sub> H <sub>79</sub> O <sub>12</sub>                | [M – H] <sup>–</sup> | 847.558 | 847.557 | 1.18  | -                                           | -                   |
| 26.50                               | Unknown-71                                       | C <sub>55</sub> H <sub>75</sub> O <sub>3</sub>                 | [M + H] <sup>+</sup> | 783.572 | 783.571 | 1.28  | -                                           | -                   |
| 27.87                               | Unknown-72                                       | C <sub>45</sub> H <sub>55</sub> O <sub>6</sub>                 | [M + H] <sup>+</sup> | 691.399 | 691.399 | 0.00  | -                                           | -                   |
| 30.89                               | Curculigosaponin C                               | C <sub>41</sub> H <sub>68</sub> O <sub>13</sub>                | [M – H] <sup>–</sup> | 767.464 | 767.466 | -3.22 | 693.421; 659.416                            | Cycloartane         |
| 30.92                               | Unknown-73                                       | C <sub>42</sub> H <sub>77</sub> O <sub>20</sub>                | [M – H] <sup>–</sup> | 901.501 | 901.501 | 0.00  | -                                           | -                   |
| <b>LOBM (Leaf Orchioides Barru)</b> |                                                  |                                                                |                      |         |         |       |                                             |                     |
| 0.80                                | Unknown-74*                                      | C <sub>10</sub> H <sub>13</sub> N <sub>4</sub> O <sub>9</sub>  | [M + H] <sup>+</sup> | 333.068 | 333.068 | 0.00  | -                                           | -                   |
| 1.52                                | Unknown-75                                       | CH <sub>18</sub> N <sub>20</sub> O <sub>7</sub>                | [M + H] <sup>+</sup> | 422.167 | 422.166 | 2.37  | -                                           | -                   |
| 4.06                                | Unknown-76                                       | C <sub>13</sub> H <sub>9</sub> O <sub>11</sub>                 | [M + H] <sup>+</sup> | 341.014 | 341.014 | 0.00  | -                                           | -                   |
| 8.77                                | Unknown-77                                       | C <sub>13</sub> H <sub>30</sub> N <sub>5</sub> O <sub>11</sub> | [M – H] <sup>–</sup> | 432.194 | 432.194 | 0.00  | -                                           | -                   |
| 13.31                               | Unknown-78                                       | C <sub>17</sub> H <sub>32</sub> N <sub>7</sub> O <sub>19</sub> | [M + H] <sup>+</sup> | 638.175 | 638.175 | 0.00  | -                                           | -                   |
| 14.27                               | Orcinol glycoside                                | C <sub>15</sub> H <sub>18</sub> O <sub>7</sub>                 | [M + H] <sup>+</sup> | 287.103 | 287.105 | -9.22 | 269.100; 256.121; 254.993; 251.093; 237.020 | Phenolic glycosides |
| 14.67                               | Unknown-79                                       | C <sub>7</sub> H <sub>5</sub> N <sub>13</sub> O <sub>4</sub>   | [M+2H] <sup>2+</sup> | 335.059 | 335.058 | 2.98  | -                                           | -                   |
| 14.85                               | Unknown-80                                       | C <sub>42</sub> H <sub>12</sub> O <sub>2</sub>                 | [M + H] <sup>+</sup> | 548.083 | 548.084 | -1.82 | -                                           | -                   |
| 15.90                               | Unknown-81                                       | C <sub>59</sub> H <sub>46</sub> O <sub>15</sub>                | [M – H] <sup>–</sup> | 994.279 | 994.284 | -5.03 | -                                           | -                   |
| 19.80                               | Curculigosaponin G                               | C <sub>42</sub> H <sub>70</sub> O <sub>13</sub>                | [M + H] <sup>+</sup> | 783.486 | 783.482 | 5.21  | 621.867; 459.726                            | Cycloartane         |
| 15.91                               | Unknown-82                                       | C <sub>66</sub> H <sub>35</sub> O <sub>11</sub>                | [M + H] <sup>+</sup> | 987.222 | 987.223 | -1.01 | -                                           | -                   |
| 20.05                               | Curculigosaponin I                               | C <sub>48</sub> H <sub>80</sub> O <sub>18</sub>                | [M + H] <sup>+</sup> | 945.537 | 945.534 | 3.03  | 783.009; 621.867; 458.726                   | Cycloartane         |
| 21.09                               | Unknown-83                                       | C <sub>26</sub> H <sub>58</sub> N <sub>17</sub> O <sub>7</sub> | [M + H] <sup>+</sup> | 720.471 | 720.470 | 1.39  | -                                           | -                   |
| 22.20                               | Unknown-84                                       | C <sub>30</sub> H <sub>61</sub> O <sub>19</sub>                | [M – H] <sup>–</sup> | 725.379 | 725.381 | -2.76 | -                                           | -                   |
| 23.27                               | Cayaonoside B3                                   | C <sub>34</sub> H <sub>50</sub> O <sub>11</sub>                | [M – H] <sup>–</sup> | 634.333 | 634.335 | -3.15 | 471.275; 455.243; 415.212; 401.196          | -                   |
| 23.90                               | Unknown-85                                       | C <sub>42</sub> H <sub>51</sub> O <sub>6</sub>                 | [M + H] <sup>+</sup> | 651.365 | 651.368 | -4.61 | -                                           | -                   |
| 24.85                               | Unknown-86                                       | C <sub>55</sub> H <sub>85</sub> O <sub>12</sub>                | [M – H] <sup>–</sup> | 937.604 | 937.604 | 0.00  | -                                           | -                   |
| 25.04                               | Unknown-87                                       | C <sub>57</sub> H <sub>86</sub> N <sub>5</sub> O <sub>5</sub>  | [M + H] <sup>+</sup> | 920.663 | 920.662 | 1.09  | -                                           | -                   |
| 27.69                               | Curculigosaponin C                               | C <sub>41</sub> H <sub>68</sub> O <sub>13</sub>                | [M + H] <sup>+</sup> | 769.467 | 769.466 | 1.34  | 606.413; 474.370                            | Cycloartane         |
| 29.01                               | Curculigosaponin H                               | C <sub>47</sub> H <sub>78</sub> O <sub>17</sub>                | [M + H] <sup>+</sup> | 915.526 | 915.524 | 1.78  | 751.350; 589.137; 458.650                   | Cycloartane         |
| 30.90                               | Unknown-88                                       | C <sub>54</sub> H <sub>68</sub> O <sub>2</sub>                 | [M – H] <sup>–</sup> | 748.515 | 748.522 | -9.35 | -                                           | -                   |
| <b>LOMB (Leaf Orchioides Maros)</b> |                                                  |                                                                |                      |         |         |       |                                             |                     |
| 0.83                                | Unknown-89**                                     | C <sub>16</sub> H <sub>11</sub> O <sub>2</sub>                 | [M + H] <sup>+</sup> | 235.078 | 235.076 | 8.51  | -                                           | -                   |
| 0.90                                | 1,1-Bis(3,4-dihydroxyphenyl)-1-(2-furan)-methane | C <sub>17</sub> H <sub>14</sub> O <sub>5</sub>                 | [M – H] <sup>–</sup> | 297.081 | 297.084 | -9.15 | 281.045; 269.081                            | Phenolic            |
| 1.19                                | Unknown-90                                       | C <sub>18</sub> H <sub>37</sub> N <sub>8</sub> O <sub>12</sub> | [M + H] <sup>+</sup> | 557.253 | 557.253 | 0.00  | -                                           | -                   |
| 1.46                                | 2,4-Dichloro-5-methoxy-3-methylphenol            | C <sub>8</sub> H <sub>8</sub> Cl <sub>2</sub> O <sub>2</sub>   | [M – H] <sup>–</sup> | 204.990 | 204.990 | -2.60 | 176.987; 174.972; 154.990; 150.972          | Phenolic            |
| 1.58                                | Laciniatoside V                                  | C <sub>27</sub> H <sub>38</sub> O <sub>14</sub>                | [M + H] <sup>+</sup> | 586.227 | 586.226 | 1.71  | 569.222; 407.170; 393.154; 343.175          | -                   |
| 2.06                                | Salidroside                                      | C <sub>14</sub> H <sub>20</sub> O <sub>7</sub>                 | [M + H] <sup>+</sup> | 300.123 | 300.121 | 6.66  | 290.946; 288.967; 283.031                   | -                   |

Table S1. Cont.

|       |                             |                                                                 |                      |         |         |       |                                    |                      |
|-------|-----------------------------|-----------------------------------------------------------------|----------------------|---------|---------|-------|------------------------------------|----------------------|
| 2.64  | Emodin Dianthrone           | C <sub>30</sub> H <sub>20</sub> O <sub>8</sub>                  | [M – H] <sup>–</sup> | 508.117 | 508.116 | 1.97  | 491.077; 467.077; 441.097; 425.066 | -                    |
| 3.02  | Unknown-91                  | C <sub>55</sub> H <sub>19</sub> O <sub>8</sub>                  | [M – H] <sup>–</sup> | 807.105 | 807.108 | -3.72 | -                                  | -                    |
| 5.26  | Unknown-92                  | C <sub>2</sub> H <sub>2</sub> N <sub>5</sub> O <sub>12</sub>    | [M + H] <sup>+</sup> | 287.967 | 287.969 | -6.95 | -                                  | -                    |
| 5.93  | Unknown-93                  | C <sub>34</sub> H <sub>13</sub> N <sub>20</sub> O <sub>2</sub>  | [M + H] <sup>+</sup> | 733.153 | 733.153 | 0.00  | -                                  | -                    |
| 5.95  | Unknown-94                  | C <sub>36</sub> H <sub>24</sub> O <sub>19</sub>                 | [M – H] <sup>–</sup> | 760.092 | 760.091 | 1.32  | -                                  | -                    |
| 6.72  | Eucommicin A                | C <sub>32</sub> H <sub>36</sub> O <sub>18</sub>                 | [M – H] <sup>–</sup> | 708.185 | 708.190 | -7.06 | 689.172; 645.182; 619.203; 617.187 | -                    |
| 7.54  | Unknown-95                  | C <sub>5</sub> H <sub>15</sub> N <sub>5</sub> O <sub>12</sub>   | [M + H] <sup>+</sup> | 337.070 | 337.072 | -5.93 | -                                  | -                    |
| 9.38  | Unknown-96                  | C <sub>33</sub> H <sub>33</sub> O <sub>7</sub>                  | [M + H] <sup>+</sup> | 541.224 | 541.223 | 1.85  | -                                  | -                    |
| 10.75 | Unknown-97                  | C <sub>33</sub> H <sub>53</sub> O <sub>15</sub>                 | [M – H] <sup>–</sup> | 689.336 | 689.338 | -2.90 | -                                  | -                    |
| 13.21 | Unknown-98                  | C <sub>42</sub> H <sub>20</sub> O <sub>6</sub>                  | [M + H] <sup>+</sup> | 620.129 | 620.126 | 4.84  | -                                  | -                    |
| 13.24 | Orchioside B                | C <sub>23</sub> H <sub>26</sub> O <sub>10</sub>                 | [M + H] <sup>+</sup> | 463.149 | 463.153 | -8.61 | 350.143; 213.143                   | Phenolic glycosides  |
| 13.32 | Unknown-99                  | C <sub>37</sub> H <sub>39</sub> N <sub>14</sub> O <sub>20</sub> | [M – H] <sup>–</sup> | 999.247 | 999.246 | 1.00  | -                                  | -                    |
| 13.68 | Unknown-100                 | C <sub>20</sub> H <sub>31</sub> O <sub>16</sub>                 | [M – H] <sup>–</sup> | 527.164 | 527.161 | 5.69  | -                                  | -                    |
| 14.87 | Unknown-101                 | C <sub>53</sub> H <sub>61</sub> O <sub>18</sub>                 | [M – H] <sup>–</sup> | 985.387 | 985.386 | 1.01  | -                                  | -                    |
| 15.45 | (1S,2R)-O-Methylnyasicoside | C <sub>24</sub> H <sub>28</sub> O <sub>11</sub>                 | [M + H] <sup>+</sup> | 493.168 | 493.163 | 8.81  | 475.159; 313.117                   | Norlignan glycosides |
| 15.66 | Unknown-102                 | C <sub>66</sub> H <sub>46</sub> O <sub>9</sub>                  | [M + H] <sup>+</sup> | 982.316 | 982.314 | 2.04  | -                                  | -                    |
| 15.91 | Unknown-103                 | C <sub>66</sub> H <sub>42</sub> O <sub>10</sub>                 | [M – H] <sup>–</sup> | 994.278 | 994.278 | 0.00  | -                                  | -                    |
| 15.93 | Unknown-104                 | C <sub>55</sub> H <sub>39</sub> O <sub>18</sub>                 | [M + H] <sup>+</sup> | 987.219 | 987.214 | 5.06  | -                                  | -                    |
| 16.74 | Theanaphthoquinone          | C <sub>28</sub> H <sub>22</sub> O <sub>11</sub>                 | [M + H] <sup>+</sup> | 534.115 | 534.116 | -1.87 | 517.112; 507.128; 477.118          | Quinones             |
| 17.43 | Unknown-105                 | C <sub>38</sub> H <sub>35</sub> N <sub>18</sub> O <sub>16</sub> | [M – H] <sup>–</sup> | 999.248 | 999.248 | 0.00  | -                                  | -                    |
| 17.84 | Unknown-106                 | C <sub>51</sub> H <sub>68</sub> O <sub>9</sub>                  | [M + H] <sup>+</sup> | 824.485 | 824.486 | -1.21 | -                                  | -                    |
| 18.98 | Unknown-107                 | C <sub>61</sub> H <sub>37</sub> O <sub>14</sub>                 | [M – H] <sup>–</sup> | 993.215 | 993.218 | -3.02 | -                                  | -                    |
| 19.32 | Curculigosaponin C          | C <sub>41</sub> H <sub>68</sub> O <sub>13</sub>                 | [M + H] <sup>+</sup> | 769.471 | 769.466 | 6.67  | 606.413; 474.370                   | Cycloartane          |
| 19.53 | Curculigosaponin I          | C <sub>48</sub> H <sub>80</sub> O <sub>18</sub>                 | [M + H] <sup>+</sup> | 945.537 | 945.534 | 2.60  | 783.009; 621.867; 458.726          | Cycloartane          |
| 19.65 | Unknown-108                 | C <sub>59</sub> H <sub>41</sub> O <sub>15</sub>                 | [M – H] <sup>–</sup> | 989.242 | 989.245 | -3.03 | -                                  | -                    |
| 19.66 | Unknown-109                 | C <sub>48</sub> H <sub>55</sub> O <sub>20</sub>                 | [M + H] <sup>+</sup> | 951.328 | 951.329 | -1.05 | -                                  | -                    |
| 19.99 | Unknown-110                 | C <sub>56</sub> H <sub>78</sub> O <sub>15</sub>                 | [M – H] <sup>–</sup> | 990.529 | 990.534 | -5.05 | -                                  | -                    |
| 20.09 | Lycorine                    | C <sub>16</sub> H <sub>17</sub> NO <sub>4</sub>                 | [M – H] <sup>–</sup> | 286.115 | 286.116 | -1.93 | 270.076; 268.097; 258.076; 256.097 | Alkaloid             |
| 20.32 | Curculigosaponin G          | C <sub>42</sub> H <sub>70</sub> O <sub>13</sub>                 | [M + H] <sup>+</sup> | 783.481 | 783.482 | -1.17 | 621.867; 459.726                   | Cycloartane          |
| 20.55 | Curculigosaponin I          | C <sub>48</sub> H <sub>80</sub> O <sub>18</sub>                 | [M – H] <sup>–</sup> | 943.527 | 943.534 | -7.67 | 783.009; 621.867; 458.726          | Cycloartane          |
| 21.23 | Unknown-111                 | C <sub>30</sub> H <sub>41</sub> O <sub>11</sub>                 | [M + H] <sup>+</sup> | 577.268 | 577.265 | 5.20  | -                                  | -                    |
| 22.08 | Unknown-112                 | C <sub>34</sub> H <sub>43</sub> O <sub>13</sub>                 | [M + H] <sup>+</sup> | 659.269 | 659.270 | -1.52 | -                                  | -                    |
| 22.88 | Unknown-113                 | C <sub>38</sub> H <sub>37</sub> N <sub>3</sub> O <sub>3</sub>   | [M + H] <sup>+</sup> | 583.283 | 583.283 | 0.00  | -                                  | -                    |
| 23.99 | Unknown-114                 | C <sub>44</sub> H <sub>42</sub> N <sub>20</sub> O <sub>3</sub>  | [M + H] <sup>+</sup> | 898.375 | 898.375 | 0.00  | -                                  | -                    |
| 24.00 | Unknown-115                 | C <sub>59</sub> H <sub>77</sub> O <sub>10</sub>                 | [M – H] <sup>–</sup> | 945.549 | 945.552 | -3.17 | -                                  | -                    |
| 24.16 | Unknown-116                 | C <sub>52</sub> H <sub>73</sub> O <sub>11</sub>                 | [M + H] <sup>+</sup> | 873.516 | 873.515 | 1.14  | -                                  | -                    |
| 24.59 | Unknown-117                 | C <sub>52</sub> H <sub>77</sub> O <sub>13</sub>                 | [M – H] <sup>–</sup> | 909.535 | 909.536 | -1.10 | -                                  | -                    |

Table S1. Cont.

|                                    |                                                  |                                                                |                      |         |         |        |                                    |                      |
|------------------------------------|--------------------------------------------------|----------------------------------------------------------------|----------------------|---------|---------|--------|------------------------------------|----------------------|
| 24.63                              | Orchioside B                                     | C <sub>23</sub> H <sub>26</sub> O <sub>10</sub>                | [M – H] <sup>-</sup> | 461.157 | 461.153 | 10.21  | 443.134; 433.150; 371.113          | Phenolic glycosides  |
| 25.22                              | Unknown-118                                      | C <sub>32</sub> H <sub>64</sub> N <sub>9</sub> O <sub>10</sub> | [M – H] <sup>-</sup> | 734.477 | 734.478 | -1.36  | -                                  | -                    |
| 25.72                              | Unknown-119                                      | C <sub>50</sub> H <sub>89</sub> O <sub>19</sub>                | [M – H] <sup>-</sup> | 993.599 | 993.599 | 0.00   | -                                  | -                    |
| 26.49                              | Adonixanthin diglucoside                         | C <sub>52</sub> H <sub>74</sub> O <sub>13</sub>                | [M + H] <sup>+</sup> | 906.513 | 906.513 | 0.00   | 889509; 729.472; 727.456; 627.368  | Glucosides           |
| 26.82                              | Unknown-120                                      | C <sub>57</sub> H <sub>71</sub> O <sub>5</sub>                 | [M + H] <sup>+</sup> | 835.532 | 835.530 | 2.39   | -                                  | -                    |
| 27.70                              | Unknown-121                                      | C <sub>54</sub> H <sub>73</sub> O <sub>12</sub>                | [M + H] <sup>+</sup> | 913.511 | 913.510 | 1.09   | -                                  | -                    |
| 29.05                              | Curculigosaponin H                               | C <sub>47</sub> H <sub>78</sub> O <sub>17</sub>                | [M + H] <sup>+</sup> | 915.524 | 915.524 | -0.19  | 751.350; 589.137; 458.650          | Cycloartane          |
| 29.28                              | Unknown-122                                      | C <sub>45</sub> H <sub>79</sub> O <sub>14</sub>                | [M – H] <sup>-</sup> | 843.548 | 843.546 | 2.37   | -                                  | -                    |
| 29.37                              | 3-O-B-D-Glucopyranosyl sitosterol                | C <sub>35</sub> H <sub>60</sub> O <sub>6</sub>                 | [M – H] <sup>-</sup> | 575.433 | 575.439 | -10.89 | 559.400; 547.400; 477.322          | Sitosterol           |
| 30.32                              | Unknown-123                                      | C <sub>56</sub> H <sub>94</sub> O <sub>14</sub>                | [M + H] <sup>+</sup> | 990.663 | 990.664 | -1.01  | -                                  | -                    |
| 30.94                              | Unknown-124                                      | C <sub>60</sub> H <sub>69</sub> O <sub>11</sub>                | [M – H] <sup>-</sup> | 965.487 | 965.484 | 3.11   | -                                  | -                    |
| <b>LOGM (Leaf Orchioides Gowa)</b> |                                                  |                                                                |                      |         |         |        |                                    |                      |
| 0.83                               | Unknown-125**                                    | C <sub>16</sub> H <sub>11</sub> O <sub>2</sub>                 | [M + H] <sup>+</sup> | 235.078 | 235.076 | 8.51   | -                                  | -                    |
| 0.87                               | 1,1-Bis(3,4-dihydroxyphenyl)-1-(2-furan)-methane | C <sub>17</sub> H <sub>14</sub> O <sub>5</sub>                 | [M – H] <sup>-</sup> | 297.082 | 297.084 | -8.48  | 281.045; 269.081                   | Phenolic             |
| 0.91                               | Crassifoside I                                   | C <sub>23</sub> H <sub>24</sub> O <sub>11</sub>                | [M – H] <sup>-</sup> | 475.130 | 475.132 | -4.33  | 457.114; 445.114; 387.108          | Phenolic             |
| 1.82                               | Unknown-126                                      | CH <sub>11</sub> N <sub>13</sub> O                             | [M + H] <sup>+</sup> | 221.122 | 221.121 | 4.52   | -                                  | -                    |
| 1.41                               | Orchioside B                                     | C <sub>23</sub> H <sub>26</sub> O <sub>10</sub>                | [M + H] <sup>+</sup> | 463.155 | 463.153 | 4.56   | 350.143; 213.143                   | Phenolic glycosides  |
| 1.46                               | 2,4-Dichloro-5-methoxy-3-methylphenol            | C <sub>8</sub> H <sub>8</sub> Cl <sub>2</sub> O <sub>2</sub>   | [M – H] <sup>-</sup> | 204.989 | 204.990 | -3.57  | 176.987; 174.972; 154.990; 150.972 | Phenolic             |
| 3.13                               | Unknown-127                                      | C <sub>17</sub> H <sub>17</sub> O <sub>15</sub>                | [M – H] <sup>-</sup> | 461.059 | 461.057 | 4.34   | -                                  | -                    |
| 8.88                               | Crassifoside I                                   | C <sub>23</sub> H <sub>24</sub> O <sub>11</sub>                | [M – H] <sup>-</sup> | 475.127 | 475.132 | -9.80  | 457.114; 445.114; 387.108          | Phenolic             |
| 13.52                              | Khainaoside C                                    | C <sub>25</sub> H <sub>28</sub> O <sub>11</sub>                | [M + H] <sup>+</sup> | 504.157 | 504.162 | -9.92  | 487.159; 309.096; 265.070; 181.085 | Glucosides           |
| 14.92                              | Pelargonidin 3-O-(6-O-Malonyl-Beta-D-Glucoside)  | C <sub>24</sub> H <sub>23</sub> O <sub>13</sub>                | [M – H] <sup>-</sup> | 519.110 | 519.114 | -7.71  | 285.170; 257.175; 243.159          | Flavonoid            |
| 15.48                              | (1S,2R)-O-Methylnyasicoside                      | C <sub>24</sub> H <sub>28</sub> O <sub>11</sub>                | [M + H] <sup>+</sup> | 493.166 | 493.163 | 6.38   | 475.159; 313.117                   | Norlignan glycosides |
| 15.84                              | Unknown-128                                      | C <sub>33</sub> H <sub>19</sub> O <sub>19</sub>                | [M + H] <sup>+</sup> | 559.104 | 559.104 | 0.00   | -                                  | -                    |
| 16.76                              | Unknown-129                                      | C <sub>31</sub> H <sub>11</sub> O <sub>11</sub>                | [M + H] <sup>+</sup> | 559.031 | 559.032 | -1.79  | -                                  | -                    |
| 17.46                              | Asiatic acid                                     | C <sub>30</sub> H <sub>48</sub> O <sub>5</sub>                 | [M + H] <sup>+</sup> | 488.350 | 488.351 | -2.05  | 473.326; 463.341; 459.310; 433.294 | -                    |
| 19.04                              | Unknown-130                                      | C <sub>21</sub> H <sub>34</sub> O <sub>18</sub>                | [M + H] <sup>+</sup> | 576.177 | 576.178 | -1.74  | -                                  | -                    |
| 19.66                              | Unknown-131                                      | C <sub>2</sub> H <sub>15</sub> N <sub>10</sub> O <sub>8</sub>  | [M + H] <sup>+</sup> | 307.107 | 307.107 | 0.00   | -                                  | -                    |
| 19.67                              | Unknown-132                                      | C <sub>25</sub> H <sub>25</sub> O <sub>9</sub>                 | [M – H] <sup>-</sup> | 469.149 | 469.149 | 0.00   | -                                  | -                    |
| 19.67                              | Orchioside A                                     | C <sub>22</sub> H <sub>26</sub> O <sub>11</sub>                | [M + H] <sup>+</sup> | 467.153 | 467.148 | 10.91  | 305.144; 291.144                   | Phenolic glycosides  |



Table S1. Cont.

|                                       |                                       |                                                                |                      |         |         |        |                                    |                     |
|---------------------------------------|---------------------------------------|----------------------------------------------------------------|----------------------|---------|---------|--------|------------------------------------|---------------------|
| 19.79                                 | Curculigosaponin G                    | C <sub>42</sub> H <sub>70</sub> O <sub>13</sub>                | [M + H] <sup>+</sup> | 783.487 | 783.482 | 6.87   | 621.867; 459.726                   | Cycloartane         |
| 20.04                                 | Curculigosaponin I                    | C <sub>48</sub> H <sub>80</sub> O <sub>18</sub>                | [M + H] <sup>+</sup> | 945.534 | 945.534 | -0.67  | 783.009; 621.867; 458.726          | Cycloartane         |
| 20.30                                 | Unknown-133                           | C <sub>43</sub> H <sub>61</sub> O <sub>19</sub>                | [M – H] <sup>–</sup> | 881.381 | 881.381 | 0.00   | -                                  | -                   |
| 23.20                                 | Unknown-134                           | C <sub>42</sub> H <sub>69</sub> O <sub>13</sub>                | [M – H] <sup>–</sup> | 781.473 | 781.474 | -1.28  | -                                  | -                   |
| 24.51                                 | Orchioside B                          | C <sub>23</sub> H <sub>26</sub> O <sub>10</sub>                | [M – H] <sup>–</sup> | 461.157 | 461.153 | 8.70   | 443.134; 433.150; 371.113          | Phenolic glycosides |
| 25.03                                 | Unknown-135                           | C <sub>30</sub> H <sub>49</sub> O <sub>5</sub>                 | [M + H] <sup>+</sup> | 527.898 | 527.899 | -1.89  | -                                  | -                   |
| 25.26                                 | Curculigosaponin G                    | C <sub>42</sub> H <sub>70</sub> O <sub>13</sub>                | [M – H] <sup>–</sup> | 781.483 | 781.482 | 2.03   | 621.867; 459.726                   | Cycloartane         |
| 25.57                                 | Unknown-136                           | C <sub>49</sub> H <sub>77</sub> O <sub>13</sub>                | [M – H] <sup>–</sup> | 873.535 | 873.536 | -1.14  | -                                  | -                   |
| 26.83                                 | Unknown-137                           | C <sub>28</sub> H <sub>54</sub> N <sub>15</sub> O              | [M + H] <sup>+</sup> | 616.463 | 616.463 | 0.00   | -                                  | -                   |
| 27.98                                 | Curculigosaponin H                    | C <sub>47</sub> H <sub>78</sub> O <sub>17</sub>                | [M + H] <sup>+</sup> | 915.526 | 915.524 | 1.78   | 751.350; 589.137; 458.650          | Cycloartane         |
| 30.39                                 | Unknown-138                           | C <sub>64</sub> H <sub>92</sub> O <sub>3</sub>                 | [M + H] <sup>+</sup> | 908.700 | 908.701 | -1.10  | -                                  | -                   |
| 31.34                                 | 2,4-Dichloro-5-methoxy-3-methylphenol | C <sub>8</sub> H <sub>8</sub> Cl <sub>2</sub> O <sub>2</sub>   | [M – H] <sup>–</sup> | 204.992 | 204.990 | 8.62   | 176.987; 174.972; 154.990; 150.972 | Phenolic            |
| <b>LLSP (Leaf Latifolia Palangka)</b> |                                       |                                                                |                      |         |         |        |                                    |                     |
| 0.83                                  | Unknown-139**                         | C <sub>16</sub> H <sub>11</sub> O <sub>2</sub>                 | [M + H] <sup>+</sup> | 235.078 | 235.076 | 8.51   | -                                  | -                   |
| 1.27                                  | Unknown-140                           | C <sub>20</sub> H <sub>29</sub> O <sub>14</sub>                | [M – H] <sup>–</sup> | 493.154 | 493.156 | -4.06  | -                                  | -                   |
| 1.47                                  | 2,4-Dichloro-5-methoxy-3-methylphenol | C <sub>8</sub> H <sub>8</sub> Cl <sub>2</sub> O <sub>2</sub>   | [M – H] <sup>–</sup> | 204.990 | 204.990 | -3.09  | 176.987; 174.972; 154.990; 150.972 | Phenolic            |
| 2.82                                  | Unknown-141                           | C <sub>45</sub> H <sub>23</sub> O <sub>17</sub>                | [M – H] <sup>–</sup> | 835.098 | 835.094 | 4.79   | -                                  | -                   |
| 3.05                                  | Curculigoside B                       | C <sub>21</sub> H <sub>24</sub> O <sub>11</sub>                | [M + H] <sup>+</sup> | 453.127 | 453.132 | -10.05 | 290.271; 276.244                   | Phenolic glycosides |
| 3.07                                  | Unknown-142                           | C <sub>57</sub> H <sub>35</sub> O <sub>11</sub>                | [M – H] <sup>–</sup> | 895.217 | 895.218 | -1.12  | -                                  | -                   |
| 4.90                                  | Unknown-143                           | C <sub>44</sub> H <sub>27</sub> O <sub>15</sub>                | [M – H] <sup>–</sup> | 795.135 | 795.135 | 0.00   | -                                  | -                   |
| 6.87                                  | Unknown-144                           | C <sub>47</sub> H <sub>53</sub> O <sub>16</sub>                | [M – H] <sup>–</sup> | 873.336 | 873.333 | 3.44   | -                                  | -                   |
| 6.89                                  | Unknown-145                           | C <sub>69</sub> H <sub>30</sub> O <sub>3</sub>                 | [M + H] <sup>+</sup> | 906.218 | 906.219 | -1.10  | -                                  | -                   |
| 7.14                                  | Orchioside A                          | C <sub>22</sub> H <sub>26</sub> O <sub>11</sub>                | [M – H] <sup>–</sup> | 465.143 | 465.148 | -9.25  | 449.108; 447.129; 435.129          | Phenolic glycosides |
| 8.24                                  | Unknown-146                           | C <sub>10</sub> H <sub>15</sub> N <sub>2</sub> O <sub>20</sub> | [M – H] <sup>–</sup> | 483.022 | 483.022 | 0.00   | -                                  | -                   |
| 9.27                                  | Unknown-147                           | C <sub>51</sub> H <sub>26</sub> O <sub>9</sub>                 | [M – H] <sup>–</sup> | 782.159 | 782.158 | 1.28   | -                                  | -                   |
| 10.04                                 | Unknown-148                           | C <sub>28</sub> H <sub>39</sub> O <sub>14</sub>                | [M – H] <sup>–</sup> | 599.233 | 599.234 | -1.67  | -                                  | -                   |
| 10.06                                 | Unknown-149                           | C <sub>69</sub> H <sub>39</sub> O <sub>3</sub>                 | [M + H] <sup>+</sup> | 915.290 | 915.289 | 1.09   | -                                  | -                   |
| 10.28                                 | Unknown-150                           | C <sub>29</sub> H <sub>48</sub> N <sub>8</sub> O <sub>20</sub> | [M – H] <sup>–</sup> | 828.299 | 828.298 | 1.21   | -                                  | -                   |
| 10.91                                 | Curculigoside B                       | C <sub>21</sub> H <sub>24</sub> O <sub>11</sub>                | [M – H] <sup>–</sup> | 451.136 | 451.132 | 10.07  | 433.114; 423.129                   | Phenolic glycosides |
| 13.31                                 | Unknown-151                           | C <sub>31</sub> H <sub>35</sub> O <sub>16</sub>                | [M + H] <sup>+</sup> | 663.191 | 663.193 | -3.02  | -                                  | -                   |
| 14.57                                 | Unknown-152                           | C <sub>41</sub> H <sub>31</sub> O <sub>12</sub>                | [M – H] <sup>–</sup> | 715.179 | 715.182 | -4.19  | -                                  | -                   |

Table S1. Cont.

|       |                                                  |                                                                 |                      |         |         |       |                                    |                         |
|-------|--------------------------------------------------|-----------------------------------------------------------------|----------------------|---------|---------|-------|------------------------------------|-------------------------|
| 14.59 | Unknown-153                                      | C <sub>42</sub> H <sub>46</sub> N <sub>12</sub> O <sub>17</sub> | [M + H] <sup>+</sup> | 990.310 | 990.310 | 0.00  | -                                  | -                       |
| 17.37 | Unknown-154                                      | C <sub>43</sub> H <sub>53</sub> O <sub>20</sub>                 | [M - H] <sup>-</sup> | 889.311 | 889.313 | -2.25 | -                                  | -                       |
| 17.98 | Unknown-155                                      | C <sub>58</sub> H <sub>60</sub> O <sub>5</sub>                  | [M + H] <sup>+</sup> | 836.445 | 836.444 | 1.20  | -                                  | -                       |
| 18.87 | Unknown-156                                      | C <sub>47</sub> H <sub>79</sub> O <sub>19</sub>                 | [M + H] <sup>+</sup> | 947.522 | 947.521 | 1.06  | -                                  | -                       |
| 19.81 | Unknown-157                                      | C <sub>55</sub> H <sub>72</sub> O <sub>15</sub>                 | [M - H] <sup>-</sup> | 972.485 | 972.487 | -2.06 | -                                  | -                       |
| 20.22 | Unknown-158                                      | C <sub>34</sub> H <sub>37</sub> O <sub>11</sub>                 | [M + H] <sup>+</sup> | 621.232 | 621.234 | -3.22 | -                                  | -                       |
| 20.43 | Curculigosaponin G                               | C <sub>42</sub> H <sub>70</sub> O <sub>13</sub>                 | [M + H] <sup>+</sup> | 783.487 | 783.482 | 7.00  | 621.867; 459.726                   | Cycloartane             |
| 21.11 | Curculigoside C                                  | C <sub>22</sub> H <sub>26</sub> O <sub>12</sub>                 | [M - H] <sup>-</sup> | 481.141 | 481.142 | -2.12 | 463.124; 453.140; 451.124          | Phenolic glycosides     |
| 22.16 | Unknown-159                                      | C <sub>16</sub> H <sub>34</sub> N <sub>7</sub> O <sub>9</sub>   | [M - H] <sup>-</sup> | 468.242 | 468.242 | 0.00  | -                                  | -                       |
| 22.17 | Unknown-160                                      | C <sub>39</sub> H <sub>59</sub> O <sub>15</sub>                 | [M + H] <sup>+</sup> | 767.387 | 767.385 | 2.61  | -                                  | -                       |
| 22.89 | Unknown-161                                      | C <sub>68</sub> H <sub>62</sub> O <sub>7</sub>                  | [M + H] <sup>+</sup> | 990.452 | 990.449 | 3.03  | -                                  | -                       |
| 23.26 | Unknown-162                                      | C <sub>58</sub> H <sub>47</sub> O <sub>12</sub>                 | [M + H] <sup>+</sup> | 935.310 | 935.307 | 3.21  | -                                  | -                       |
| 23.34 | Unknown-163                                      | C <sub>25</sub> H <sub>66</sub> N <sub>16</sub> O <sub>19</sub> | [M - H] <sup>-</sup> | 894.469 | 894.468 | 1.12  | -                                  | -                       |
| 24.36 | Curculigosaponin I                               | C <sub>46</sub> H <sub>80</sub> O <sub>18</sub>                 | [M - H] <sup>-</sup> | 943.530 | 943.534 | -5.02 | 783.009; 621.867; 458.726          | Cycloartane             |
| 24.48 | Unknown-164                                      | C <sub>48</sub> H <sub>61</sub> N <sub>5</sub> O <sub>15</sub>  | [M - H] <sup>-</sup> | 947.416 | 947.416 | 0.00  | -                                  | -                       |
| 24.52 | Orchioside B                                     | C <sub>23</sub> H <sub>26</sub> O <sub>10</sub>                 | [M - H] <sup>-</sup> | 461.157 | 461.153 | 9.35  | 443.134; 433.150; 371.113          | Phenolic glycosides     |
| 24.84 | Nyasicoside                                      | C <sub>23</sub> H <sub>26</sub> O <sub>11</sub>                 | [M - H] <sup>-</sup> | 477.150 | 477.148 | 6.07  | 459.129; 449.145; 447.129          | Phenolic                |
| 25.05 | Curculigosaponin G                               | C <sub>42</sub> H <sub>70</sub> O <sub>13</sub>                 | [M - H] <sup>-</sup> | 781.475 | 781.482 | -9.11 | 621.867; 459.726                   | Cycloartane             |
| 25.33 | Unknown-165                                      | C <sub>67</sub> H <sub>76</sub> O <sub>6</sub>                  | [M + H] <sup>+</sup> | 976.564 | 976.564 | 0.00  | -                                  | -                       |
| 25.92 | Curculigosaponin H                               | C <sub>47</sub> H <sub>78</sub> O <sub>17</sub>                 | [M - H] <sup>-</sup> | 913.525 | 913.524 | 0.90  | 751.350; 589.137; 458.650          | Cycloartane             |
| 26.00 | Unknown-166                                      | C <sub>58</sub> H <sub>77</sub> O <sub>10</sub>                 | [M + H] <sup>+</sup> | 933.550 | 933.552 | -2.14 | -                                  | -                       |
| 26.12 | Unknown-167                                      | C <sub>51</sub> H <sub>76</sub> N <sub>6</sub> O <sub>10</sub>  | [M - H] <sup>-</sup> | 932.562 | 932.561 | 1.07  | -                                  | -                       |
| 26.71 | Unknown-168                                      | C <sub>49</sub> H <sub>79</sub> O <sub>9</sub>                  | [M + H] <sup>+</sup> | 811.575 | 811.572 | 3.70  | -                                  | -                       |
| 27.50 | 1,1-Bis(3,4-dihydroxyphenyl)-1-(2-furan)-methane | C <sub>17</sub> H <sub>14</sub> O <sub>5</sub>                  | [M - H] <sup>-</sup> | 297.082 | 297.084 | -6.12 | 281.045; 269.081                   | Phenolic                |
| 27.73 | Unknown-169                                      | C <sub>59</sub> H <sub>87</sub> O <sub>10</sub>                 | [M + H] <sup>+</sup> | 955.631 | 955.629 | 2.09  | -                                  | -                       |
| 28.03 | Curculigosaponin H                               | C <sub>47</sub> H <sub>78</sub> O <sub>17</sub>                 | [M + H] <sup>+</sup> | 915.520 | 915.524 | -4.23 | 751.350; 589.137; 458.650          | Cycloartane             |
| 29.94 | 3-O-B-D-Glucopyranosyl sitosterol                | C <sub>35</sub> H <sub>60</sub> O <sub>6</sub>                  | [M - H] <sup>-</sup> | 575.434 | 575.439 | -8.46 | 559.400; 547.400; 477.322          | Sitosterol              |
| 30.09 | Tragopogonsaponin M                              | C <sub>51</sub> H <sub>76</sub> O <sub>16</sub>                 | [M + H] <sup>+</sup> | 944.515 | 944.513 | 2.12  | 927.510; 913.494; 783.468; 767.473 | Pentacyclic triterpenes |
| 30.90 | Unknown-170 <sup>^</sup>                         | C <sub>56</sub> H <sub>77</sub> O <sub>13</sub>                 | [M + H] <sup>+</sup> | 957.534 | 957.536 | -2.09 | -                                  | Phenolic                |

Table S1. Cont.

|                                          |                                                  |                                                                |                      |         |         |       |                                    |                      |  |
|------------------------------------------|--------------------------------------------------|----------------------------------------------------------------|----------------------|---------|---------|-------|------------------------------------|----------------------|--|
| 30.92                                    | Unknown-171                                      | C <sub>57</sub> H <sub>65</sub> O <sub>5</sub>                 | [M – H] <sup>-</sup> | 829.484 | 829.483 | 1.21  | -                                  | -                    |  |
| <b>LLSB (Leaf Latifolia Biji Nangka)</b> |                                                  |                                                                |                      |         |         |       |                                    |                      |  |
| 3.75                                     | Unknown-172                                      | C <sub>7</sub> H <sub>16</sub> N <sub>5</sub> O <sub>9</sub>   | [M – H] <sup>-</sup> | 314.094 | 314.095 | -3.18 | -                                  | -                    |  |
| 5.49                                     | Curculigoside B                                  | C <sub>21</sub> H <sub>24</sub> O <sub>11</sub>                | [M + H] <sup>+</sup> | 453.137 | 453.132 | 10.25 | 290.271; 276.244                   | Phenolic glycosides  |  |
| 6.68                                     | Unknown-173                                      | C <sub>6</sub> H <sub>10</sub> O <sub>13</sub>                 | [M + H] <sup>+</sup> | 290.013 | 290.012 | 3.45  | -                                  | -                    |  |
| 13.32                                    | Unknown-174                                      | C <sub>10</sub> H <sub>12</sub> N <sub>8</sub> O <sub>10</sub> | [M – H] <sup>-</sup> | 404.067 | 404.068 | -2.47 | -                                  | -                    |  |
| 14.93                                    | Unknown-176                                      | C <sub>15</sub> H <sub>13</sub> O <sub>8</sub>                 | [M + H] <sup>+</sup> | 321.063 | 321.061 | 6.23  | -                                  | -                    |  |
| 15.05                                    | Unknown-175                                      | C <sub>26</sub> H <sub>35</sub> O <sub>16</sub>                | [M – H] <sup>-</sup> | 603.195 | 603.192 | 4.97  | -                                  | -                    |  |
| 16.85                                    | (1S,2R)-O-Methylnyasicoside                      | C <sub>24</sub> H <sub>28</sub> O <sub>11</sub>                | [M + H] <sup>+</sup> | 493.168 | 493.163 | 10.43 | 475.159; 313.117                   | Norlignan glycosides |  |
| 17.63                                    | Unknown-177                                      | C <sub>26</sub> H <sub>37</sub> O <sub>19</sub>                | [M – H] <sup>-</sup> | 653.189 | 653.193 | -6.12 | -                                  | -                    |  |
| 22.25                                    | Unknown-178                                      | C <sub>41</sub> H <sub>45</sub> O <sub>12</sub>                | [M – H] <sup>-</sup> | 729.289 | 729.291 | -2.74 | -                                  | -                    |  |
| 22.41                                    | Unknown-179                                      | C <sub>47</sub> H <sub>49</sub> O                              | [M + H] <sup>+</sup> | 629.381 | 629.378 | 4.77  | -                                  | -                    |  |
| 23.22                                    | Unknown-180                                      | C <sub>50</sub> H <sub>85</sub> O <sub>17</sub>                | [M – H] <sup>-</sup> | 955.561 | 955.563 | -2.09 | -                                  | -                    |  |
| 24.20                                    | Unknown-181                                      | C <sub>40</sub> H <sub>44</sub> O <sub>9</sub>                 | [M + H] <sup>+</sup> | 668.294 | 668.298 | -5.99 | -                                  | -                    |  |
| 24.51                                    | Curculigoside B                                  | C <sub>21</sub> H <sub>24</sub> O <sub>11</sub>                | [M – H] <sup>-</sup> | 451.128 | 451.132 | -7.66 | 433.114; 423.129                   | Phenolic glycosides  |  |
| 24.52                                    | Unknown-182                                      | C <sub>16</sub> H <sub>30</sub> O <sub>15</sub>                | [M – H] <sup>-</sup> | 462.159 | 462.158 | 2.16  | -                                  | -                    |  |
| 24.56                                    | Orchioside B                                     | C <sub>23</sub> H <sub>26</sub> O <sub>10</sub>                | [M – H] <sup>-</sup> | 461.157 | 461.153 | 10.43 | 443.134; 433.150; 371.113          | Phenolic glycosides  |  |
| 24.63                                    | Unknown-183                                      | C <sub>14</sub> H <sub>25</sub> O <sub>13</sub>                | [M – H] <sup>-</sup> | 399.113 | 399.114 | -2.51 | -                                  | -                    |  |
| 25.56                                    | 3-O-B-D-Glucopyranosyl sitosterol                | C <sub>35</sub> H <sub>60</sub> O <sub>6</sub>                 | [M – H] <sup>-</sup> | 575.442 | 575.439 | 5.10  | 559.400; 547.400; 477.322          | Sitosterol           |  |
| 26.80                                    | Curculigosaponin C                               | C <sub>41</sub> H <sub>68</sub> O <sub>13</sub>                | [M – H] <sup>-</sup> | 767.463 | 767.466 | -3.48 | 693.421; 659.416                   | Cycloartane          |  |
| 28.44                                    | Unknown-184                                      | C <sub>60</sub> H <sub>78</sub> O <sub>6</sub>                 | [M + H] <sup>+</sup> | 894.580 | 894.579 | 1.12  | -                                  | -                    |  |
| 30.92                                    | Unknown-185                                      | C <sub>47</sub> H <sub>59</sub> O <sub>7</sub>                 | [M + H] <sup>+</sup> | 735.427 | 735.426 | 1.36  | -                                  | -                    |  |
| 31.14                                    | 2,4-Dichloro-5-methoxy-3-methylphenol            | C <sub>8</sub> H <sub>8</sub> Cl <sub>2</sub> O <sub>2</sub>   | [M – H] <sup>-</sup> | 204.992 | 204.990 | 8.62  | 176.987; 174.972; 154.990; 150.972 | Phenolic             |  |
| <b>LLSK (Leaf Latifolia Puncak)</b>      |                                                  |                                                                |                      |         |         |       |                                    |                      |  |
| 0.86                                     | Pothobanoside C                                  | C <sub>26</sub> H <sub>38</sub> O <sub>16</sub>                | [M – H] <sup>-</sup> | 606.212 | 606.216 | -6.60 | 443.155; 427.124; 411.129; 359.098 | Glycosides           |  |
| 0.89                                     | 1,1-Bis(3,4-dihydroxyphenyl)-1-(2-furan)-methane | C <sub>17</sub> H <sub>14</sub> O <sub>5</sub>                 | [M – H] <sup>-</sup> | 297.082 | 297.084 | -8.82 | 281.045; 269.081                   | Phenolic             |  |
| 3.38                                     | Unknown-186                                      | C <sub>13</sub> H <sub>4</sub> N <sub>20</sub>                 | [M + H] <sup>+</sup> | 440.093 | 440.092 | 2.27  | -                                  | -                    |  |
| 7.89                                     | Curculigoside B                                  | C <sub>21</sub> H <sub>24</sub> O <sub>11</sub>                | [M + H] <sup>+</sup> | 453.136 | 453.132 | 9.81  | 290.271; 276.244                   | Phenolic glycosides  |  |
| 12.87                                    | Unknown-187                                      | C <sub>52</sub> H <sub>100</sub> O <sub>15</sub>               | [M – H] <sup>-</sup> | 964.701 | 964.706 | -5.18 | -                                  | -                    |  |
| 13.29                                    | Unknown-188                                      | C <sub>25</sub> H <sub>42</sub> O <sub>15</sub>                | [M – H] <sup>-</sup> | 582.257 | 582.252 | 8.59  | -                                  | -                    |  |
| 13.70                                    | Unknown-189                                      | C <sub>26</sub> H <sub>29</sub> O <sub>11</sub>                | [M + H] <sup>+</sup> | 517.169 | 517.171 | -3.87 | -                                  | -                    |  |

Table S1. Cont.

|       |                                       |                                                                 |                      |         |         |       |                                    |                     |
|-------|---------------------------------------|-----------------------------------------------------------------|----------------------|---------|---------|-------|------------------------------------|---------------------|
| 14.94 | Unknown-190                           | C <sub>38</sub> H <sub>43</sub> O <sub>16</sub>                 | [M – H] <sup>–</sup> | 755.250 | 755.255 | -6.62 | -                                  | -                   |
| 15.03 | Unknown-191                           | C <sub>49</sub> H <sub>27</sub> O <sub>8</sub>                  | [M + H] <sup>+</sup> | 743.167 | 743.170 | -4.04 | -                                  | -                   |
| 15.51 | Unknown-192                           | C <sub>56</sub> H <sub>21</sub> O <sub>4</sub>                  | [M + H] <sup>+</sup> | 757.143 | 757.144 | -1.32 | -                                  | -                   |
| 15.84 | Unknown-193                           | C <sub>32</sub> H <sub>59</sub> O <sub>11</sub>                 | [M – H] <sup>–</sup> | 619.406 | 619.406 | 0.00  | -                                  | -                   |
| 16.87 | Unknown-194                           | C <sub>26</sub> H <sub>40</sub> N <sub>7</sub> O <sub>18</sub>  | [M – H] <sup>–</sup> | 738.242 | 738.243 | -1.35 | -                                  | -                   |
| 18.34 | Unknown-195                           | C <sub>29</sub> H <sub>51</sub> O <sub>14</sub>                 | [M + H] <sup>+</sup> | 623.329 | 623.328 | 1.60  | -                                  | -                   |
| 19.03 | Unknown-196                           | C <sub>32</sub> H <sub>60</sub> O <sub>13</sub>                 | [M – H] <sup>–</sup> | 652.410 | 652.403 | 10.73 | -                                  | -                   |
| 19.53 | Unknown-197                           | C <sub>49</sub> H <sub>67</sub> O <sub>4</sub>                  | [M + H] <sup>+</sup> | 719.506 | 719.503 | 4.17  | -                                  | -                   |
| 19.83 | Unknown-198                           | C <sub>44</sub> H <sub>80</sub> O <sub>14</sub>                 | [M – H] <sup>–</sup> | 832.559 | 832.555 | 4.80  | -                                  | -                   |
| 20.31 | Unknown-199                           | C <sub>48</sub> H <sub>83</sub> O <sub>11</sub>                 | [M – H] <sup>–</sup> | 835.591 | 835.594 | -3.59 | -                                  | -                   |
| 20.62 | Unknown-200                           | C <sub>36</sub> H <sub>49</sub> O <sub>7</sub>                  | [M – H] <sup>–</sup> | 593.347 | 593.348 | -1.69 | -                                  | -                   |
| 21.11 | Unknown-201                           | C <sub>42</sub> H <sub>49</sub> O <sub>15</sub>                 | [M – H] <sup>–</sup> | 793.302 | 793.307 | -6.30 | -                                  | -                   |
| 23.24 | Unknown-202                           | C <sub>35</sub> H <sub>47</sub> O <sub>12</sub>                 | [M + H] <sup>+</sup> | 659.308 | 659.306 | 3.03  | -                                  | -                   |
| 24.23 | Unknown-203                           | C <sub>55</sub> H <sub>103</sub> O <sub>11</sub>                | [M + H] <sup>+</sup> | 939.750 | 939.749 | 1.06  | -                                  | -                   |
| 24.55 | Unknown-204                           | C <sub>55</sub> H <sub>63</sub> O <sub>15</sub>                 | [M – H] <sup>–</sup> | 963.418 | 963.417 | 1.04  | -                                  | -                   |
| 24.56 | Orchioside B                          | C <sub>23</sub> H <sub>26</sub> O <sub>10</sub>                 | [M – H] <sup>–</sup> | 461.157 | 461.153 | 8.70  | 443.134; 433.150; 371.113          | Phenolic glycosides |
| 24.59 | Curculigoside B                       | C <sub>21</sub> H <sub>24</sub> O <sub>11</sub>                 | [M – H] <sup>–</sup> | 451.128 | 451.132 | -9.21 | 433.114; 423.129                   | Phenolic glycosides |
| 25.17 | Unknown-205                           | C <sub>62</sub> H <sub>64</sub> O <sub>7</sub>                  | [M – H] <sup>–</sup> | 920.466 | 920.465 | 1.09  | -                                  | -                   |
| 25.18 | Orchioside A                          | C <sub>22</sub> H <sub>26</sub> O <sub>11</sub>                 | [M – H] <sup>–</sup> | 465.144 | 465.148 | -8.18 | 449.108; 447.129; 435.129          | Phenolic glycosides |
| 25.66 | 3-O-B-D-Glucopyranosyl sitosterol     | C <sub>35</sub> H <sub>60</sub> O <sub>6</sub>                  | [M – H] <sup>–</sup> | 575.441 | 575.439 | 3.36  | 559.400; 547.400; 477.322          | Sitosterol          |
| 25.93 | Curculigosaponin H                    | C <sub>47</sub> H <sub>78</sub> O <sub>17</sub>                 | [M – H] <sup>–</sup> | 913.526 | 913.524 | 2.22  | 751.350; 589.137; 458.650          | Cycloartane         |
| 26.02 | Unknown-206                           | C <sub>40</sub> H <sub>51</sub> O <sub>16</sub>                 | [M + H] <sup>+</sup> | 787.316 | 787.317 | -1.27 | -                                  | -                   |
| 26.11 | Unknown-207                           | C <sub>34</sub> H <sub>74</sub> N <sub>11</sub> O <sub>10</sub> | [M – H] <sup>–</sup> | 796.562 | 796.562 | 0.00  | -                                  | -                   |
| 26.74 | Unknown-208                           | C <sub>46</sub> H <sub>47</sub> O <sub>9</sub>                  | [M + H] <sup>+</sup> | 743.326 | 743.322 | 5.38  | -                                  | -                   |
| 27.04 | Unknown-209                           | C <sub>58</sub> H <sub>107</sub> O <sub>11</sub>                | [M – H] <sup>–</sup> | 979.782 | 979.781 | 1.02  | -                                  | -                   |
| 27.32 | Unknown-210                           | C <sub>54</sub> H <sub>83</sub> O <sub>12</sub>                 | [M + H] <sup>+</sup> | 923.588 | 923.588 | 0.00  | -                                  | -                   |
| 30.12 | Unknown-211                           | C <sub>63</sub> H <sub>87</sub> O <sub>5</sub>                  | [M + H] <sup>+</sup> | 923.655 | 923.655 | 0.00  | -                                  | -                   |
| 30.90 | Unknown-212 <sup>^</sup>              | C <sub>56</sub> H <sub>77</sub> O <sub>13</sub>                 | [M + H] <sup>+</sup> | 957.534 | 957.536 | -2.09 | -                                  | -                   |
| 30.92 | Unknown-213                           | C <sub>50</sub> H <sub>61</sub> O <sub>13</sub>                 | [M – H] <sup>–</sup> | 869.411 | 869.411 | 0.00  | -                                  | -                   |
| 31.44 | 2,4-Dichloro-5-methoxy-3-methylphenol | C <sub>8</sub> H <sub>8</sub> Cl <sub>2</sub> O <sub>2</sub>    | [M – H] <sup>–</sup> | 204.992 | 204.990 | 10.57 | 176.987; 174.972; 154.990; 150.972 | Phenolic            |

Table S1. Cont.

| PLSP (Petiole Latifolia Palangka)    |                                                  |                                                                |                      |         |         |       |                                    |                     |
|--------------------------------------|--------------------------------------------------|----------------------------------------------------------------|----------------------|---------|---------|-------|------------------------------------|---------------------|
| 0.83                                 | Unknown-214**                                    | C <sub>16</sub> H <sub>11</sub> O <sub>2</sub>                 | [M + H] <sup>+</sup> | 235.078 | 235.076 | 8.51  | -                                  | -                   |
| 0.92                                 | 1,1-Bis(3,4-dihydroxyphenyl)-1-(2-furan)-methane | C <sub>17</sub> H <sub>14</sub> O <sub>5</sub>                 | [M – H] <sup>–</sup> | 297.081 | 297.084 | -9.15 | 281.045; 271.061; 269.081          | Phenolic            |
| 0.93                                 | Orchioside A                                     | C <sub>22</sub> H <sub>26</sub> O <sub>11</sub>                | [M + H] <sup>+</sup> | 467.153 | 467.148 | 10.69 | 305.144; 291.144                   | Phenolic glycosides |
| 0.94                                 | Crassifoside I                                   | C <sub>23</sub> H <sub>24</sub> O <sub>11</sub>                | [M – H] <sup>–</sup> | 475.129 | 475.132 | -6.85 | 457.114; 445.114; 387.108          | Phenolic            |
| 1.48                                 | 2,4-Dichloro-5-methoxy-3-methylphenol            | C <sub>8</sub> H <sub>8</sub> Cl <sub>2</sub> O <sub>2</sub>   | [M – H] <sup>–</sup> | 204.990 | 204.990 | -1.62 | 176.987; 174.972; 154.990; 150.972 | Phenolic            |
| 6.32                                 | Orchioside B                                     | C <sub>23</sub> H <sub>26</sub> O <sub>10</sub>                | [M + H] <sup>+</sup> | 463.157 | 463.153 | 8.87  | 350.143; 213.143                   | Phenolic glycosides |
| 9.28                                 | Unknown-215                                      | C <sub>18</sub> H <sub>32</sub> O <sub>13</sub>                | [M + H] <sup>+</sup> | 456.186 | 456.184 | 4.38  | -                                  | -                   |
| 12.55                                | Breviscapin                                      | C <sub>21</sub> H <sub>18</sub> O <sub>12</sub>                | [M – H] <sup>–</sup> | 462.078 | 462.079 | -2.16 | 285.040; 267.029; 257.045; 243.029 | Glucuronates        |
| 13.29                                | Unknown-216                                      | C <sub>20</sub> H <sub>11</sub> N <sub>6</sub> O <sub>19</sub> | [M – H] <sup>–</sup> | 639.007 | 639.008 | -1.56 | -                                  | -                   |
| 21.21                                | Unknown-217                                      | C <sub>31</sub> H <sub>31</sub> O <sub>11</sub>                | [M + H] <sup>+</sup> | 579.184 | 579.186 | -3.45 | -                                  | -                   |
| 21.81                                | Prunin                                           | C <sub>21</sub> H <sub>22</sub> O <sub>10</sub>                | [M + H] <sup>+</sup> | 434.118 | 434.121 | -6.91 | 273.075; 153.019; 147.045          | -                   |
| 22.88                                | Unknown-218                                      | C <sub>24</sub> H <sub>37</sub> O <sub>13</sub>                | [M – H] <sup>–</sup> | 533.228 | 533.223 | 9.38  | -                                  | -                   |
| 23.11                                | Unknown-219                                      | C <sub>40</sub> H <sub>52</sub> O <sub>7</sub>                 | [M + H] <sup>+</sup> | 644.376 | 644.371 | 7.76  | -                                  | -                   |
| 23.31                                | Unknown-220                                      | C <sub>18</sub> H <sub>24</sub> O <sub>16</sub>                | [M – H] <sup>–</sup> | 496.102 | 496.106 | -8.06 | -                                  | -                   |
| 24.53                                | Curculigoside B                                  | C <sub>21</sub> H <sub>24</sub> O <sub>11</sub>                | [M – H] <sup>–</sup> | 451.128 | 451.132 | -9.21 | 433.114; 423.129                   | Phenolic glycosides |
| 25.49                                | Curculigosaponin C                               | C <sub>41</sub> H <sub>68</sub> O <sub>13</sub>                | [M – H] <sup>–</sup> | 767.467 | 767.466 | 0.82  | 693.421; 659.416                   | Cycloartane         |
| 26.10                                | Curculigosaponin G                               | C <sub>42</sub> H <sub>70</sub> O <sub>13</sub>                | [M – H] <sup>–</sup> | 781.480 | 781.482 | -1.81 | 621.867; 459.726                   | Cycloartane         |
| 26.70                                | Unknown-221                                      | C <sub>63</sub> H <sub>74</sub> O <sub>8</sub>                 | [M + H] <sup>+</sup> | 958.539 | 958.538 | 1.04  | -                                  | -                   |
| 28.30                                | Unknown-222                                      | C <sub>62</sub> H <sub>68</sub> N <sub>7</sub> O <sub>3</sub>  | [M + H] <sup>+</sup> | 958.538 | 958.538 | 0.00  | -                                  | -                   |
| PLSB (Petiole Latifolia Biji Nangka) |                                                  |                                                                |                      |         |         |       |                                    |                     |
| 0.88                                 | Vanillin                                         | C <sub>8</sub> H <sub>8</sub> O <sub>3</sub>                   | [M – H] <sup>–</sup> | 151.048 | 151.047 | 6.34  | 150.981; 137.018; 136.015; 129.113 | Phenolic            |
| 11.54                                | Orchioside B                                     | C <sub>23</sub> H <sub>26</sub> O <sub>10</sub>                | [M – H] <sup>–</sup> | 461.148 | 461.153 | -9.30 | 443.134; 433.150; 371.113          | Phenolic glycosides |
| 16.27                                | Unknown-223                                      | C <sub>21</sub> H <sub>33</sub> O <sub>15</sub>                | [M + H] <sup>+</sup> | 525.176 | 525.181 | -9.52 | -                                  | -                   |
| 19.22                                | Neosakuranin                                     | C <sub>22</sub> H <sub>24</sub> O <sub>10</sub>                | [M + H] <sup>+</sup> | 448.137 | 448.136 | 2.23  | 431.133; 293.138; 287.091; 271.096 | -                   |
| 24.66                                | Curculigoside B                                  | C <sub>21</sub> H <sub>24</sub> O <sub>11</sub>                | [M – H] <sup>–</sup> | 451.128 | 451.132 | -9.99 | 433.114; 423.129                   | Phenolic glycosides |
| 25.23                                | Orchioside A                                     | C <sub>22</sub> H <sub>26</sub> O <sub>11</sub>                | [M – H] <sup>–</sup> | 465.144 | 465.148 | -6.89 | 449.108; 447.129; 435.129          | Phenolic glycosides |
| 25.26                                | Sophoranone                                      | C <sub>30</sub> H <sub>36</sub> O <sub>4</sub>                 | [M – H] <sup>–</sup> | 460.262 | 460.261 | 2.17  | 443.222; 391.190; 387.159; 257.190 | Flavonoids          |
| 25.92                                | Curculigosaponin H                               | C <sub>47</sub> H <sub>78</sub> O <sub>17</sub>                | [M – H] <sup>–</sup> | 913.526 | 913.524 | 2.77  | 751.350; 589.137; 458.650          | Cycloartane         |
| 30.92                                | Unknown-224                                      | C <sub>11</sub> H <sub>8</sub> N <sub>4</sub> O <sub>8</sub>   | [M + H] <sup>+</sup> | 320.003 | 320.002 | 3.12  | -                                  | -                   |
| 31.24                                | 2,4-Dichloro-5-methoxy-3-methylphenol            | C <sub>8</sub> H <sub>8</sub> Cl <sub>2</sub> O <sub>2</sub>   | [M – H] <sup>–</sup> | 204.992 | 204.990 | 8.62  | 176.987; 174.972; 154.990; 150.972 | Phenolic            |

Table S1. Cont.

| PLSK (Petiole Latifolia Puncak) |                                                  |                                                                |                      |         |         |       |                                    |                     |
|---------------------------------|--------------------------------------------------|----------------------------------------------------------------|----------------------|---------|---------|-------|------------------------------------|---------------------|
| 0.85                            | Crassifoside I                                   | C <sub>23</sub> H <sub>24</sub> O <sub>11</sub>                | [M + H] <sup>+</sup> | 475.128 | 475.131 | -8.11 | 457.114; 447.129; 445.114; 387.108 | Phenolic            |
| 0.88                            | 1,1-Bis(3,4-dihydroxyphenyl)-1-(2-furan)-methane | C <sub>17</sub> H <sub>14</sub> O <sub>5</sub>                 | [M - H] <sup>-</sup> | 297.082 | 297.084 | -7.47 | 281.045; 269.081                   | Phenolic            |
| 1.44                            | 2,4-Dichloro-5-methoxy-3-methylphenol            | C <sub>8</sub> H <sub>8</sub> Cl <sub>2</sub> O <sub>2</sub>   | [M - H] <sup>-</sup> | 204.990 | 204.990 | -2.11 | 176.987; 174.972; 154.990; 150.972 | Phenolic            |
| 3.14                            | Lycorine                                         | C <sub>16</sub> H <sub>17</sub> NO <sub>4</sub>                | [M + H] <sup>+</sup> | 288.116 | 288.116 | 0.17  | 270.113; 252.102; 240.102; 216.102 | Alkaloid            |
| 3.68                            | Orchioside A                                     | C <sub>22</sub> H <sub>26</sub> O <sub>11</sub>                | [M - H] <sup>-</sup> | 465.150 | 465.148 | 5.79  | 449.108; 447.129; 435.129          | Phenolic glycosides |
| 6.09                            | Unknown-225                                      | C <sub>20</sub> H <sub>25</sub> O <sub>11</sub>                | [M + H] <sup>+</sup> | 441.136 | 441.139 | -6.80 | -                                  | -                   |
| 6.38                            | Curculigoside B                                  | C <sub>21</sub> H <sub>24</sub> O <sub>11</sub>                | [M + H] <sup>+</sup> | 453.133 | 453.132 | 2.75  | 290.271; 276.244                   | Phenolic glycosides |
| 13.06                           | Unknown-226                                      | C <sub>38</sub> H <sub>27</sub> N <sub>18</sub> O <sub>2</sub> | [M - H] <sup>-</sup> | 767.256 | 767.255 | 1.30  | -                                  | -                   |
| 19.01                           | Lycorine                                         | C <sub>16</sub> H <sub>17</sub> NO <sub>4</sub>                | [M - H] <sup>-</sup> | 286.118 | 286.116 | 8.90  | 270.076; 268.097; 258.076; 256.097 | Alkaloid            |
| 23.29                           | Curculigosaponin G                               | C <sub>42</sub> H <sub>70</sub> O <sub>13</sub>                | [M - H] <sup>-</sup> | 781.475 | 781.482 | -8.47 | 621.867; 459.726                   | Cycloartane         |
| 24.59                           | Orchioside B                                     | C <sub>23</sub> H <sub>26</sub> O <sub>10</sub>                | [M - H] <sup>-</sup> | 461.157 | 461.153 | 8.70  | 443.134; 433.150; 371.113          | Phenolic glycosides |
| 24.63                           | Curculigoside B                                  | C <sub>21</sub> H <sub>24</sub> O <sub>11</sub>                | [M - H] <sup>-</sup> | 451.129 | 451.132 | -5.44 | 433.114; 423.129                   | Phenolic glycosides |
| 25.23                           | Unknown-227                                      | C <sub>69</sub> H <sub>78</sub> O <sub>2</sub>                 | [M - H] <sup>-</sup> | 938.600 | 938.600 | 0.00  | -                                  | -                   |
| 25.53                           | Unknown-228                                      | C <sub>34</sub> H <sub>41</sub> O <sub>11</sub>                | [M + H] <sup>+</sup> | 609.272 | 609.269 | 4.92  | -                                  | -                   |
| 25.94                           | Curculigosaponin H                               | C <sub>47</sub> H <sub>78</sub> O <sub>17</sub>                | [M - H] <sup>-</sup> | 913.524 | 913.524 | -0.19 | 751.350; 589.137; 458.650          | Cycloartane         |
| 29.21                           | 3-O-B-D-Glucopyranosyl sitosterol                | C <sub>35</sub> H <sub>60</sub> O <sub>6</sub>                 | [M - H] <sup>-</sup> | 575.434 | 575.439 | -9.15 | 559.400; 547.400; 477.322          | Sitosterol          |
| 30.89                           | Curculigosaponin C                               | C <sub>41</sub> H <sub>68</sub> O <sub>13</sub>                | [M - H] <sup>-</sup> | 767.466 | 767.466 | 0.17  | 693.421; 659.416                   | Cycloartane         |
| 31.03                           | 2,4-Dichloro-5-methoxy-3-methylphenol            | C <sub>8</sub> H <sub>8</sub> Cl <sub>2</sub> O <sub>2</sub>   | [M - H] <sup>-</sup> | 204.992 | 204.990 | 9.60  | 176.987; 174.972; 154.990; 150.972 | Phenolic            |

\* and ^: same RT and molecule formula

**A**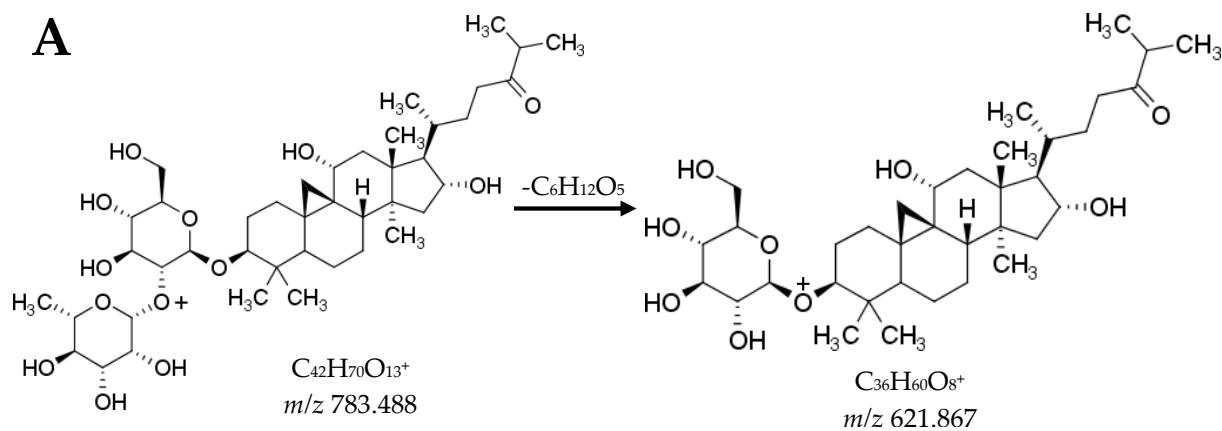**B**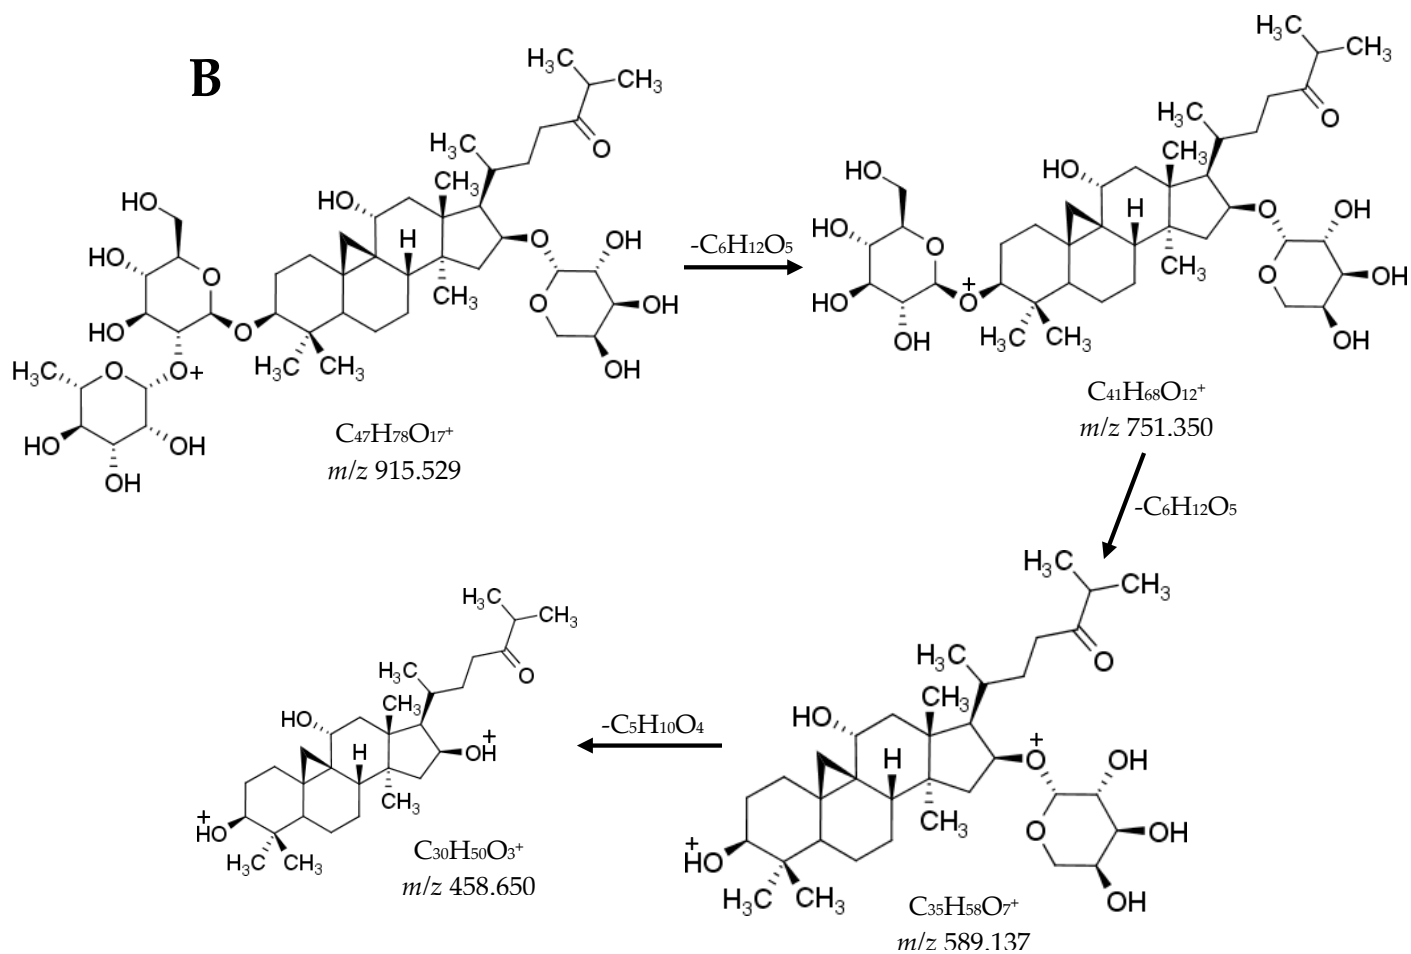

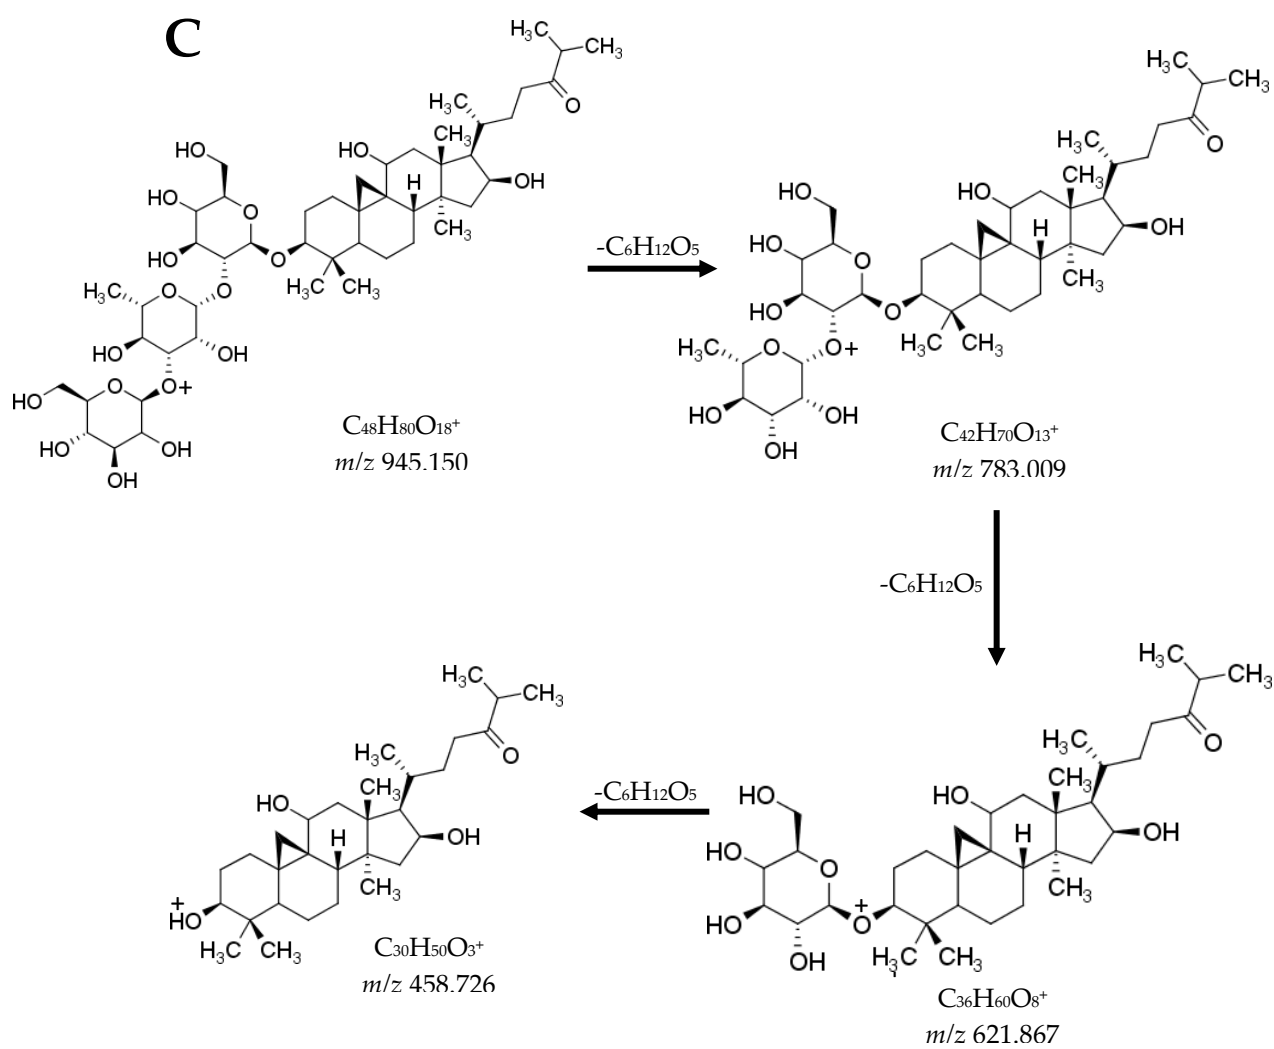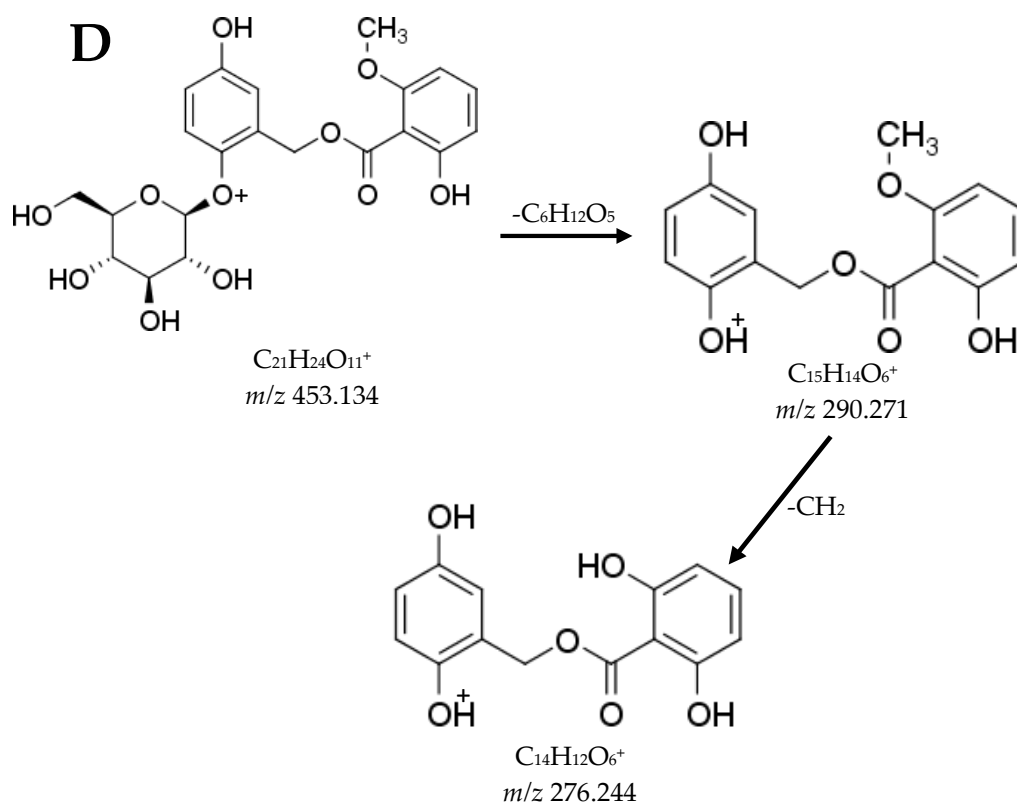



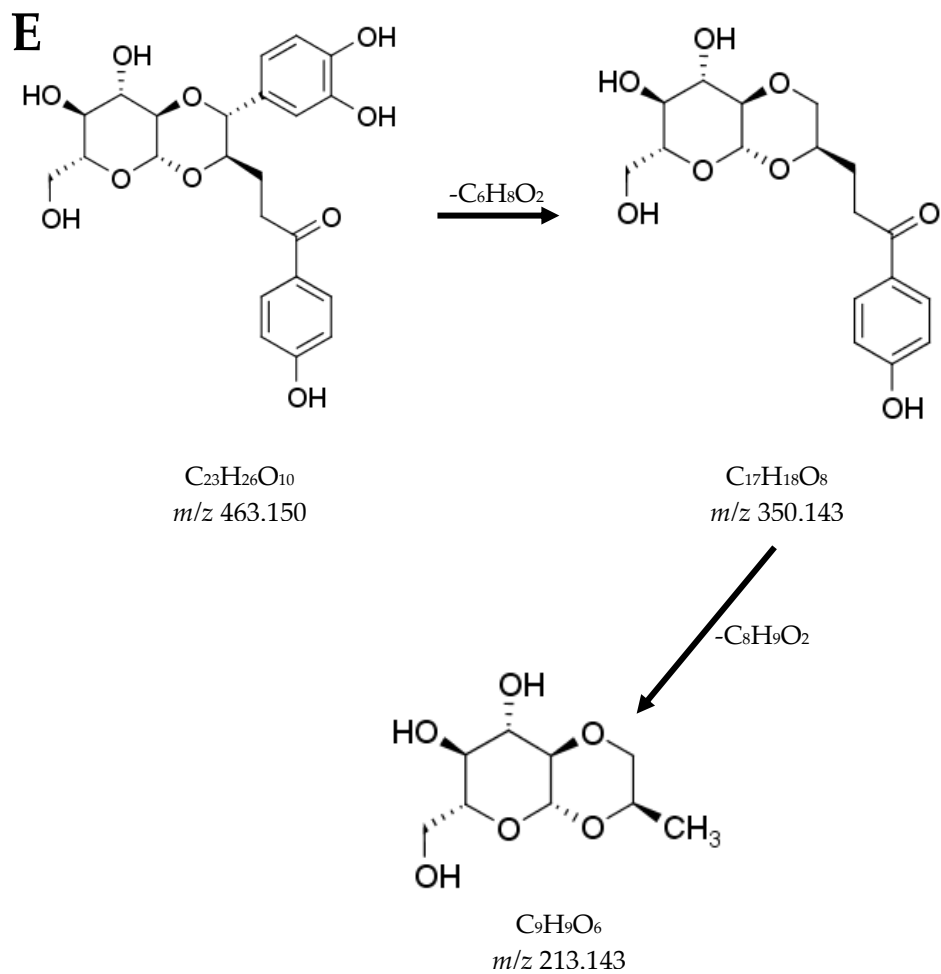

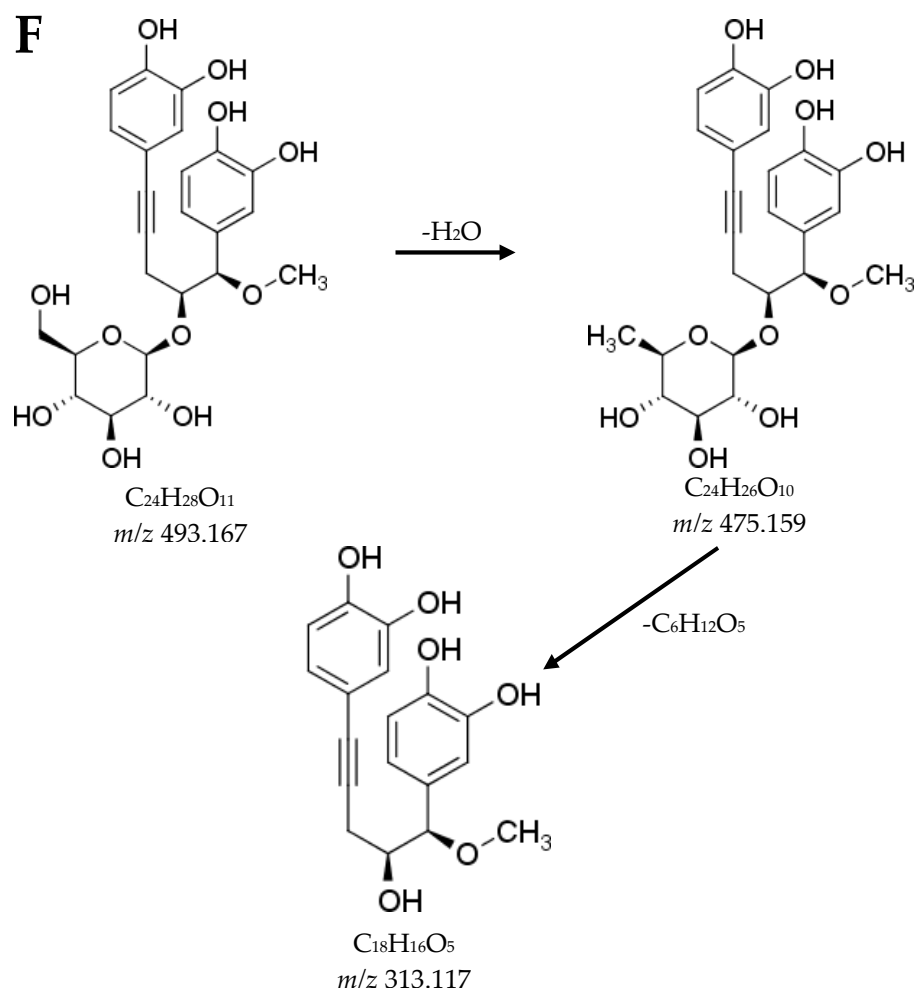

**Figure S3.** The proposed fragmentation pattern of representative curculigosaponin G (triterpenoid) (A), curculigosaponin H (triterpenoid) (B), curculigosaponin I (triterpenoid) (C), curculigoside B (phenolic) (D), orchioiside B (phenolic) (E), (1S,2R)-O-Methylnyasicoside (norlignan) (F) at ion mode  $[M + H]^+$  and  $[M - H]^-$  in *C. orchoides* and *C. latifolia*.

A

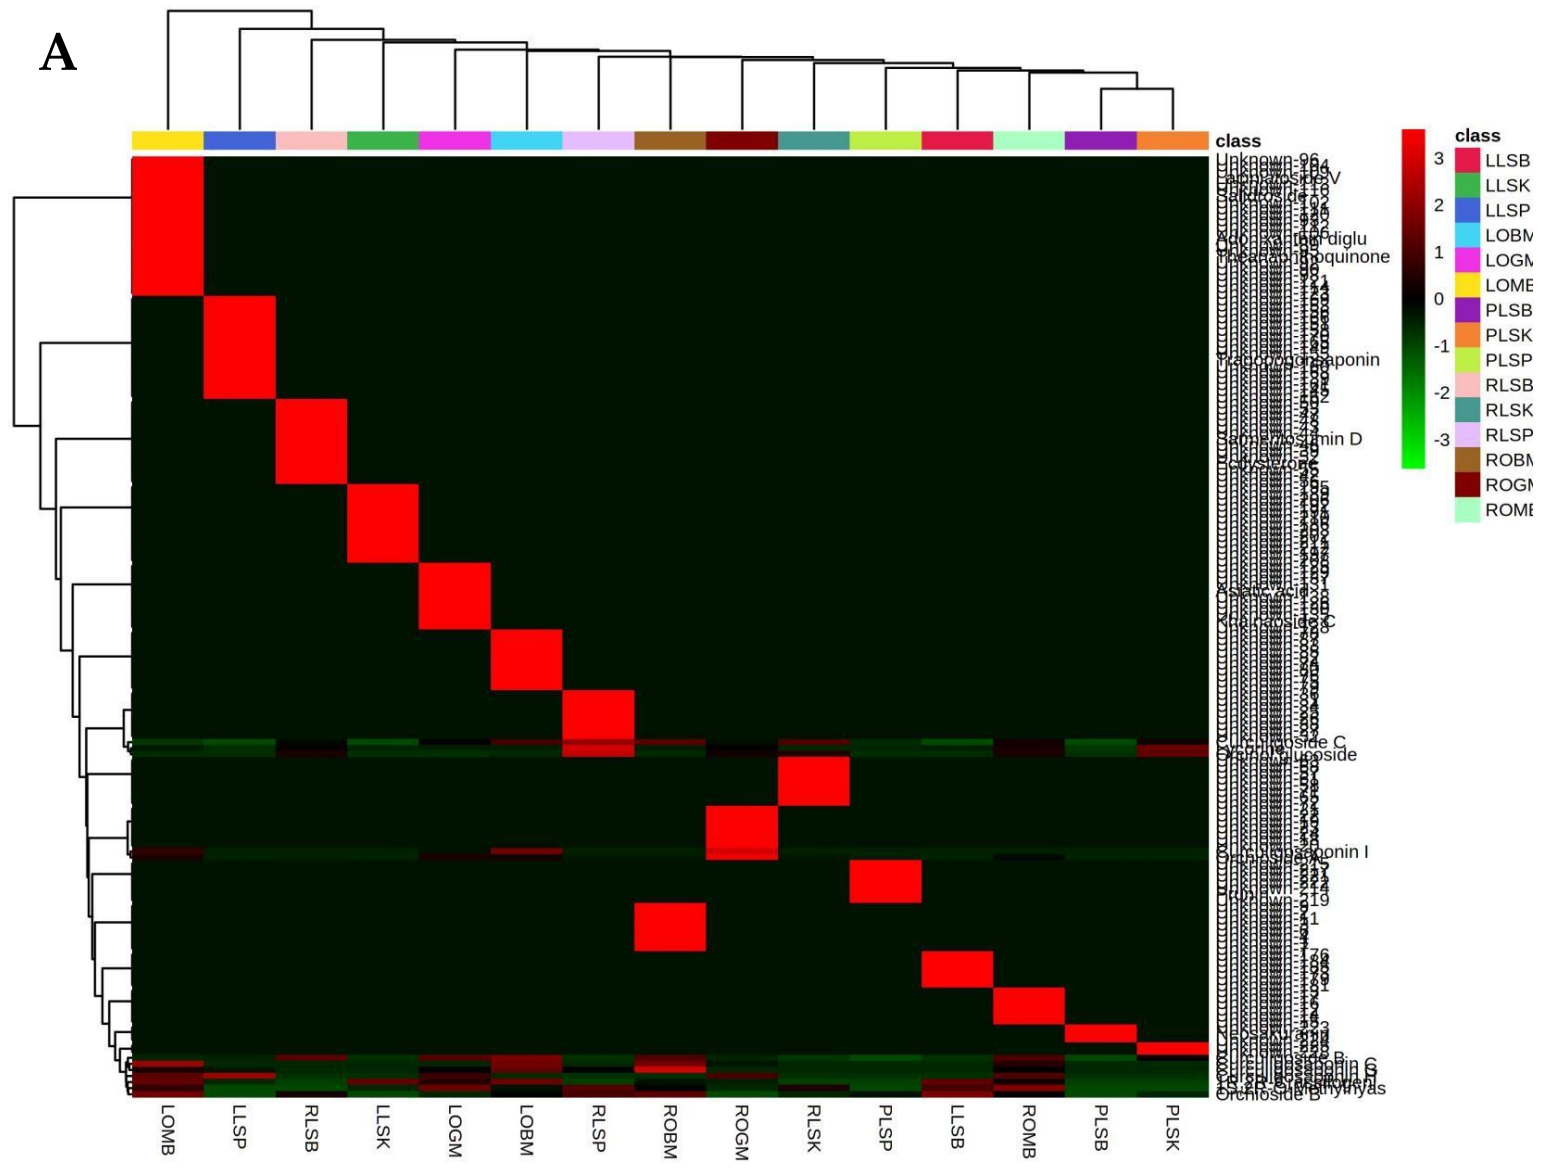



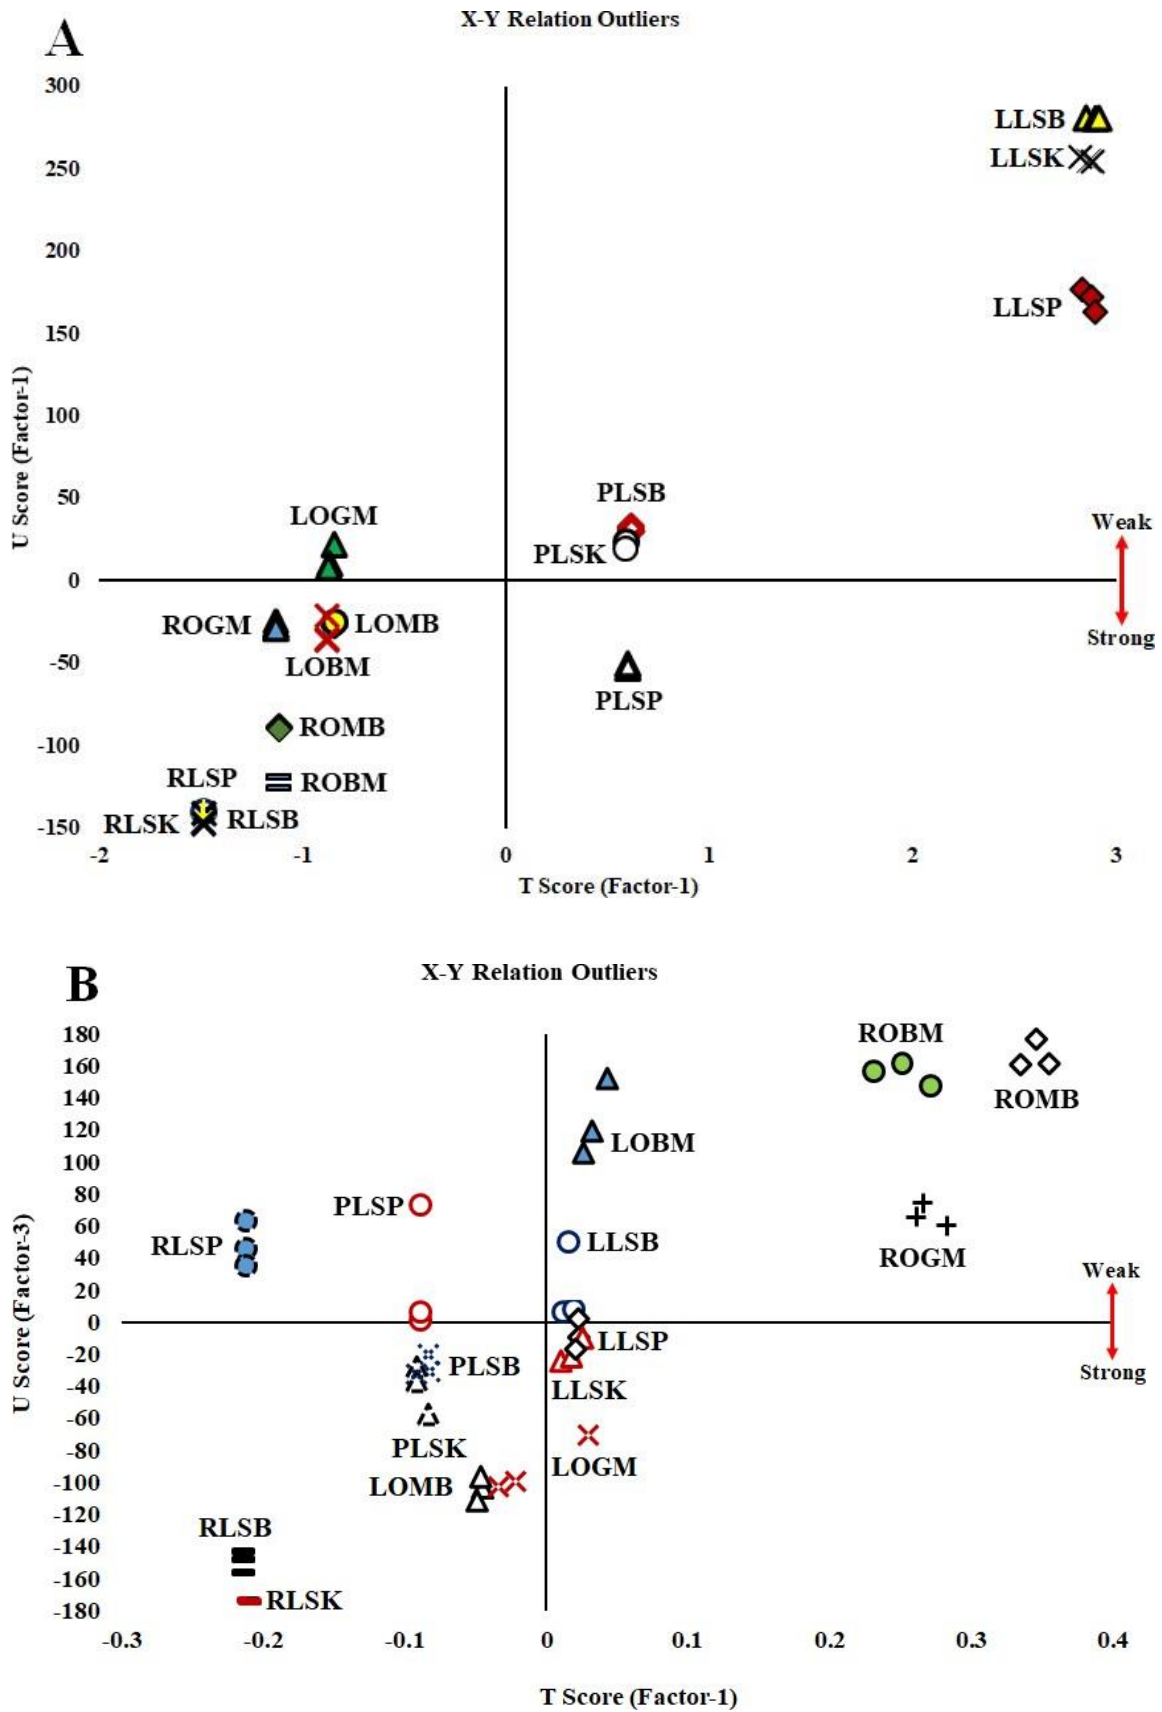

**Figure S5.** Partial least squares plot x-y relation outliers antioxidant (A) and inhibitory of  $\alpha$ -glucosidase (B) activity of a 70% ethanol extract of *C. orchioides* and *C. latifolia*. Axes and ordinate plots show partial least squares scores for each organ sample.

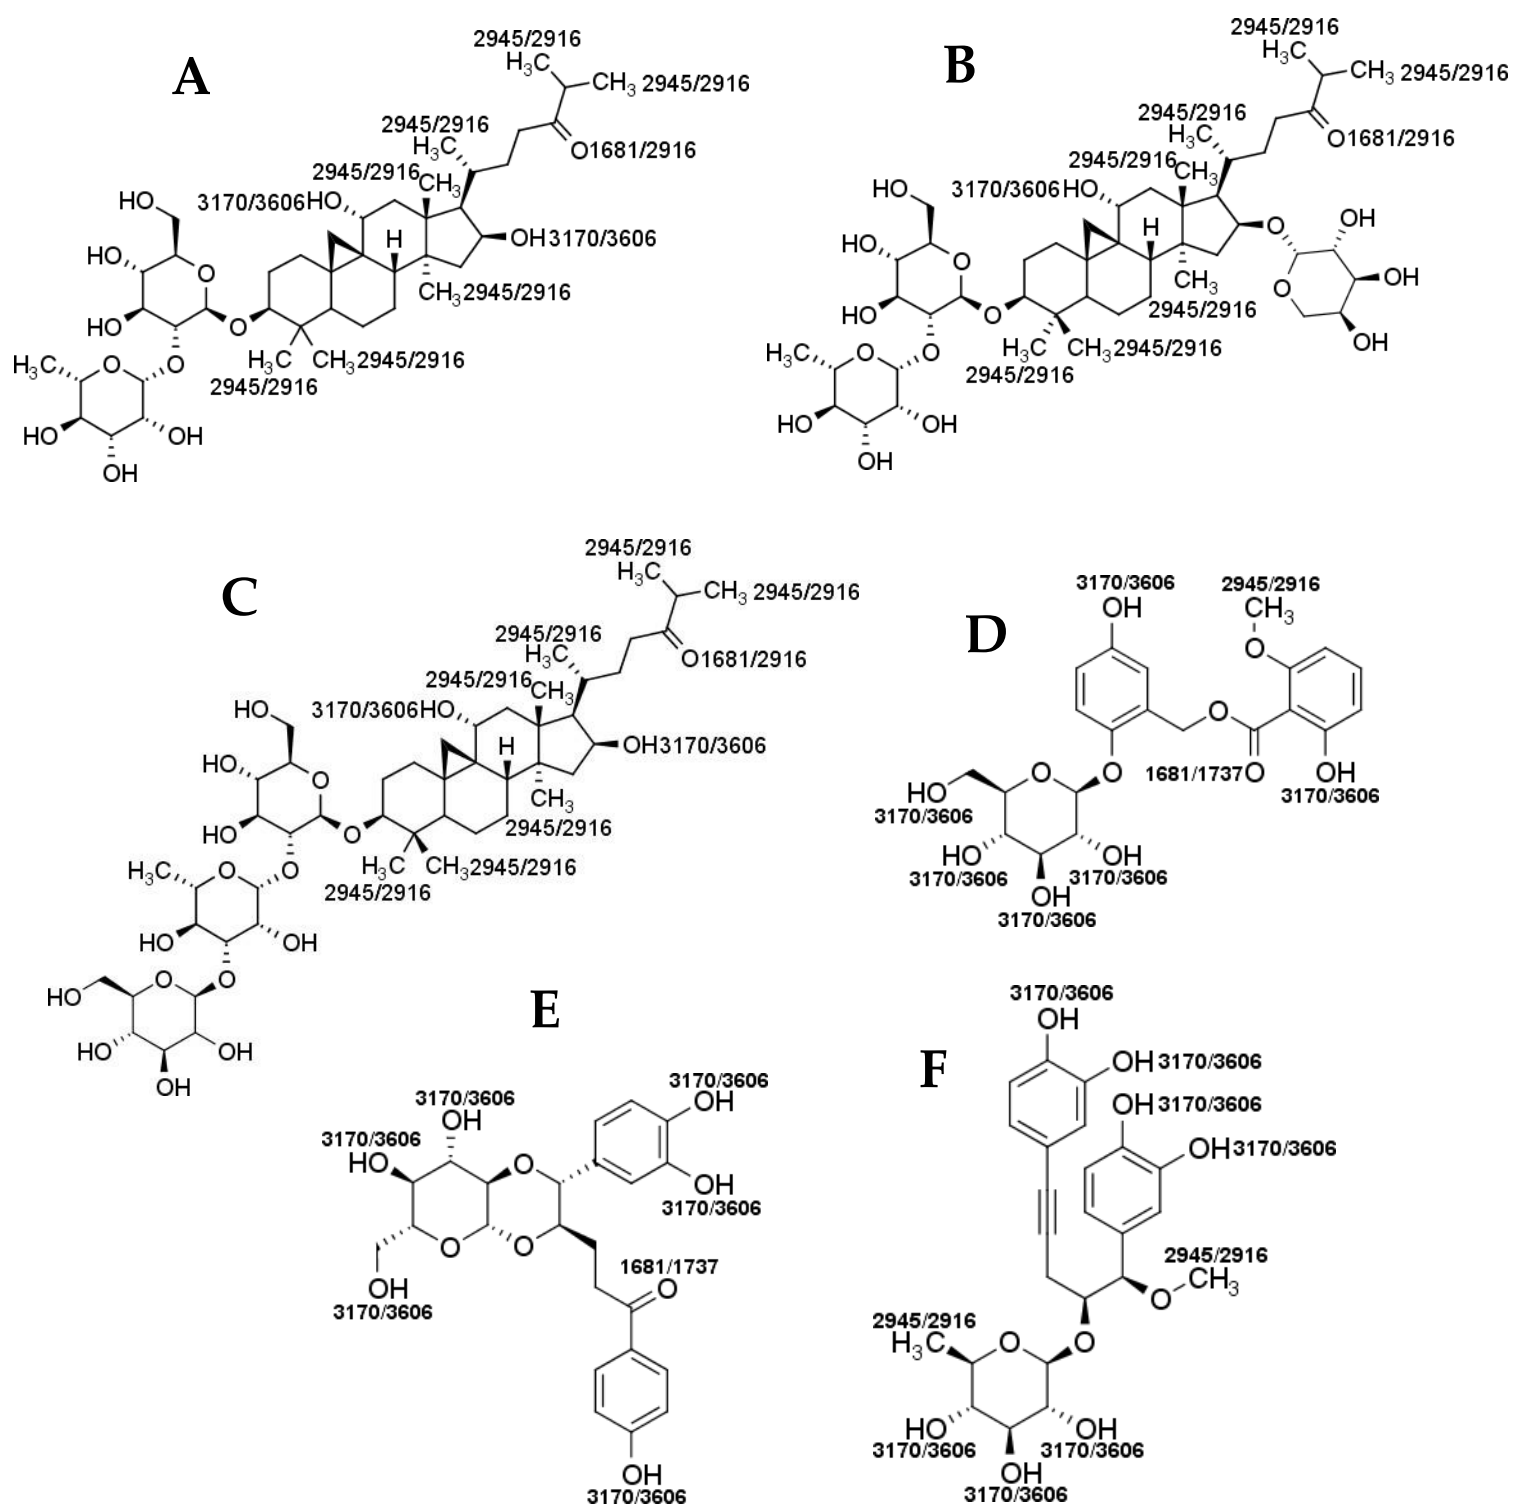

**Figure S6.** Chemical structure of curculigosaponin G (A), curculigosaponin H (B), curculigosaponin I (C), curculigoside B (D), orchioiside B (E), and (1S,2R)-O-Methylnyasicoside (F) and their functional groups might have a major contribution to the antioxidant activity and the inhibition of  $\alpha$ -glucosidase.

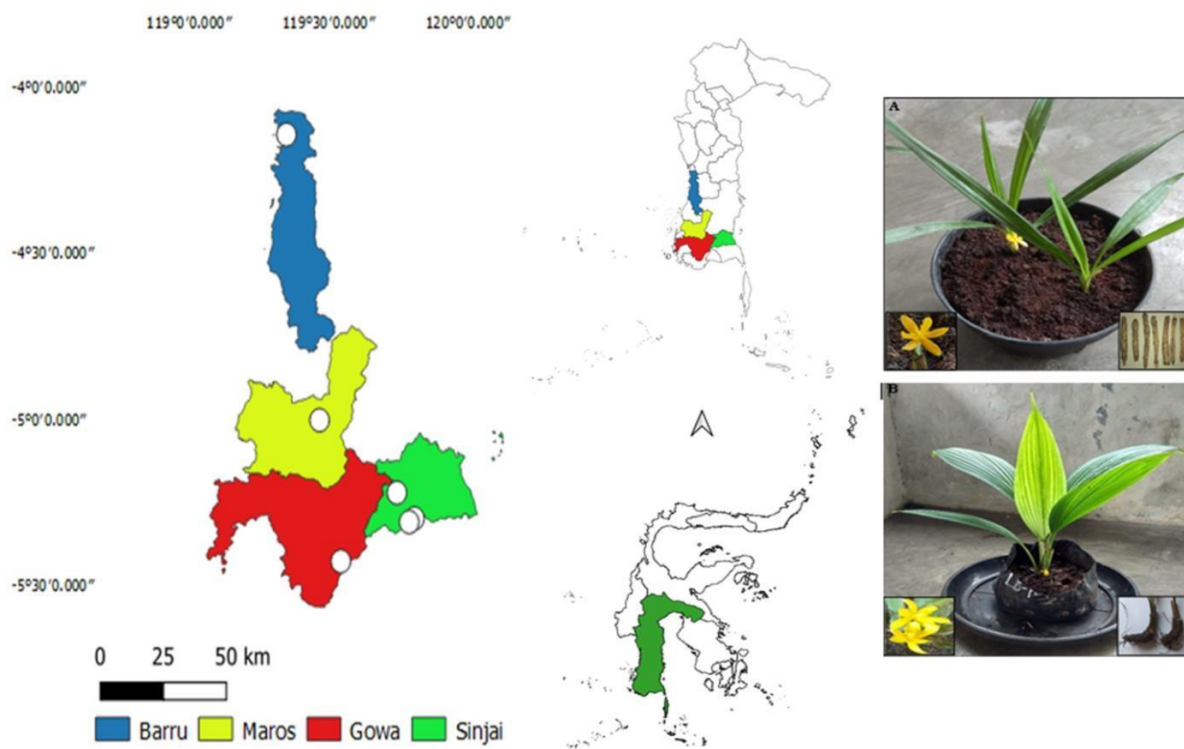

**Figure S7.** Sampling location of *Curculigo* spp. in South Sulawesi, Sulawesi Island, Indonesia. *Curculigo orchiooides* Gaertn. (A) and *Curculigo latifolia* Dryand. ex W.T.Aiton (B).
